1

2

3

4 Characterization of two novel EF-hand proteins identifies a clade of putative Ca<sup>2+</sup>-  
5 binding protein specific to the Ambulacraria

6

7

8 Arisnel Soto-Acabá<sup>1</sup>, Pablo A. Ortíz-Pineda<sup>1#a</sup>, José E. García-Arrarás<sup>1\*</sup>

9

10

11

12 <sup>1</sup>Department of Biology, University of Puerto Rico, Río Piedras Campus, San Juan,  
13 Puerto Rico

14 <sup>#a</sup>Current Address: Department of Pediatrics, Yale University, New Haven, Connecticut,  
15 United States of America

16

17

18 \* Corresponding author

19 E-mail: [jegarcia@hpcf.upr.edu](mailto:jegarcia@hpcf.upr.edu) (JEG)

20

21

## 22 **Abstract**

23 In recent years, transcriptomic databases have become one of the main sources for  
24 protein discovery. In our studies of nervous system and digestive tract regeneration in  
25 echinoderms, we have identified several transcripts that have attracted our attention. One  
26 of these molecules corresponds to a previously unidentified transcript (*Orpin*) from the  
27 sea cucumber *Holothuria glaberrima* that appeared to be upregulated during intestinal  
28 regeneration. We have now identified a second highly similar sequence and analyzed the  
29 predicted proteins using bioinformatics tools. Both sequences have EF-hand motifs  
30 characteristic of calcium-binding proteins (CaBPs) and N-terminal signal peptides.  
31 Sequence comparison analyses such as multiple sequence alignments and phylogenetic  
32 analyses only showed significant similarity to sequences from other echinoderms or from  
33 hemichordates. Semi-quantitative RT-PCR analyses revealed that transcripts from these  
34 sequences are expressed in various tissues including muscle, haemal system, gonads,  
35 and mesentery. However, contrary to previous reports, there was no significant differential  
36 expression in regenerating tissues. Nonetheless, the identification of unique features in  
37 the predicted proteins suggests that these might comprise a novel subfamily of EF-hand  
38 containing proteins specific to the Ambulacraria clade.

39

40

41

42

43

## 44 Introduction

45 Modern genome and transcriptome studies allow for the identification and discovery of  
46 hitherto unknown sequences that code for different types of proteins. This discovery  
47 process has been possible due to the ease by which DNA and/or RNA sequences are  
48 obtained, even from non-model organisms that make available millions of sequences for  
49 comparative analyses. Our group has focused on transcriptomes obtained from normal  
50 and regenerating tissues of an echinoderm, the sea cucumber *Holothuria glaberrima* [1–  
51 4]. Studies in this model have been done to explore gene expression of intestinal and  
52 nervous systems in an attempt to expand our knowledge of the Echinodermata, a phylum  
53 which lies on the evolutionary branch of chordates [5,6].

54  
55 In this effort, we have constructed several transcriptomic libraries using high throughput  
56 sequence analyses, including EST (expressed sequence tag) analyses [3], 454 and  
57 Illumina sequencing [7,8]. Moreover, we have performed differential gene expression  
58 studies, particularly microarrays and transcriptomic comparisons between normal and  
59 regenerating tissues. The results from these experiments have been a large number of  
60 differentially expressed genes associated with the regenerating tissues.

61  
62 Out of these hundreds of genes, we have focused on the study of unknown sequences  
63 that show increased expression during regeneration. One of these molecules  
64 corresponds to a previously unidentified transcript from *H. glaberrima* that was shown to  
65 be upregulated during the initial stages of intestine regeneration by microarray analyses

66 [3,8]. The sequence was annotated to public databases as *Orpin* (GU191018.1,  
67 ACZ73832.1) on 12-13-2009.

68

69 We now provide a full report on the putative *Orpin* sequence including the prediction of  
70 an N-terminal signal peptide, which is characteristic of secreted proteins. Moreover, we  
71 have discovered an additional *Orpin* isoform in *H. glaberrima* and provide a full description  
72 of both *Orpin* isoforms. Both sequences are newly discovered putative EF-hand coding  
73 proteins with structural characteristics that are evolutionarily related to this group of  
74 proteins. We have also probed other available databases and have found previously  
75 undescribed sequences whose similarities suggest they are part of the *Orpin* family, a  
76 protein family that appears to be restricted to the Ambulacraria clade.

77

## 78 **Materials and methods**

### 79 **Ethics statement**

80 This research deals only with invertebrate animals, thus the University of Puerto Rico  
81 IACUC waives ethical approval of research performed on invertebrates. Animals were  
82 sacrificed by immersion in ice cold water for 29-30 min and then sectioning the anterior  
83 part of the animal close to the oral nerve ring, which accounts for the main component  
84 of the nervous system.

85

## 86 **Animals**

87 Adult specimens (10–15 cm in length) of the sea cucumber *H. glaberrima* were collected  
88 in coastal areas of northeastern Puerto Rico and kept in indoor in aerated seawater  
89 aquaria at room temperature (RT: 22°C ± 2°C). Evisceration was induced by 0.35 M KCl  
90 injections (3–5 mL) into the coelomic cavity [1]. Eviscerated animals were let to  
91 regenerate for 3, 5, 7, 10, and 14 days before the dissection and tissue extraction. For  
92 the dissection, organisms were anesthetized by placement in ice-cold water for 1 h.  
93 [1,3,9]. Dissected tissues were rinsed in ice-cold filtered seawater and processed for RNA  
94 isolation.

95

## 96 **RNA extraction and cDNA synthesis**

97 RNA extraction was performed on tissue extracts of normal and 3, 5, 7, 10, and 14 dpe  
98 animals. Extracted tissues included gonads, mesentery, haemal system, respiratory tree,  
99 longitudinal muscle, and radial nerve cords. After dissection, tissues were placed in 1 mL  
100 of TRIzol reagent (Invitrogen), homogenized with a PowerGen Model 125 Homogenizer  
101 (Thermo Scientific) and incubated 30 min on ice. These samples were mixed vigorously  
102 with 200 µL of chloroform and incubated 10 min at RT. After centrifuged at 12,000 rpm at  
103 4°C, the aqueous RNA phase was separated, mixed with 70% ethanol, and transferred  
104 to an RNeasy Mini Kit column (QIAGEN) for deoxyribonuclease (DNase) treatment  
105 (QIAGEN). Total RNA was extracted following the manufacturer's protocol. The  
106 concentration and purity of the total RNA was measured using a NanoDrop ND-1000  
107 spectrophotometer (Thermo Scientific). The cDNA was synthesized from 1 µg of the total

108 RNA using the ImProm-II Reverse Transcription System (Promega) and oligo (dT)<sub>23</sub>  
109 primers.

110

## 111 **Semi-quantitative RT-PCR**

112 RT-PCR reactions were performed using cDNAs prepared from extracted RNA. These  
113 reactions were set up in a reaction volume of 25  $\mu$ L with the final concentration of the  
114 PCR primers of 100 nM. Specific primers for the most variable regions between *Orpin A*  
115 and *Orpin B* sequences were designed using OligoAnalyzer tools from the Integrated DNA  
116 Technology webpage ([www.idtdna.com](http://www.idtdna.com)). The primers used were: *Orpin B* forward: 5'-  
117 ACAGGGAGTACAAACAGTCGTCAA-3' and *Orpin B* reverse: 5'-  
118 CTATTTACTCTGCAACTGACACTTTCT-3'; *Orpin A* forward: 5'-  
119 ACTTCTGCAGAATCAGTTGTTAAGA-3' and *Orpin A* reverse: 5'-  
120 TTCAGTGGAGTCGCCAAC-3'. RT-PCR reactions were performed on three independent  
121 RNA samples purified from each of the regeneration stages (previously mentioned) as  
122 well as from the normal intestines. The PCR amplification was done by an initial  
123 denaturation step of 94°C (45 s), a primer annealing step of 50.2°C (45 s), and an  
124 extension step of 72°C (45 s) with a final additional 72°C (10 min) for 28 cycles for *Orpin*  
125 *A*, 26 cycles for *Orpin B*, and 26 cycles for *NADH*, as the amplification parameters for  
126 each pair of primers. All samples were analyzed in triplicate. Additional tissues were  
127 amplified for 35 cycles (2–4 replicates). The relative expression of *Orpin A* and *Orpin B*  
128 was normalized relative to the expression of the housekeeping gene *NADH*  
129 *dehydrogenase subunit 5* using ImageJ software [10] from the optical density values from  
130 electrophoresed sample bands on 1% agarose gels, using a Molecular Imager ChemiDoc

131 XRS+ (BioRad). The primers used for the *NADH* sequence amplification were: forward:  
132 5'-CGGCTACTTCTGCGTTCTTC-3' and reverse: 5'-ATAGGCGCTGTCTCACTGGT-3'.  
133 The *Orpin A* and *Orpin B* sequences were confirmed by sequencing excised  
134 electrophoresed sample bands at the Sequencing and Genotyping Facility (UPR-RP).

135

## 136 **Bioinformatics analyses**

137 Homolog sequences were identified and retrieved from the NCBI GeneBank protein  
138 database [11] using the original Orpin sequence previously identified [8] as a query.  
139 BLASTp [12,13] were performed against the public non-redundant protein database in  
140 GeneBank. Conserved domain identification and UTR analysis were performed using  
141 CDD [14], RegRNA [15], UTRScan [16] and PSIPRED [17,18], ScanProsite [19],  
142 InterProScan 5 [20,21], Phobos [22], SignalP 5.0 [23], and Phobius [24] on Geneious  
143 11.1.5 software (<https://www.geneious.com>). Sequence alignments were carried out with  
144 MUSCLE [25] (10 iterations) and the Blosum62 matrix and edited with Geneious software  
145 11.1.5 (<https://www.geneious.com>). Note: It is possible that there are N-terminal  
146 sequencing artifacts on two annotated sequences from *A. japonicus* sequences  
147 (ARI48335.1 and PIK49419.1). If we delete the residues from the predicted cytoplasmic  
148 N-terminal region from the ARI48335.1 sequence and from PIK49419.1 up until their next  
149 methionine, they also show a predicted signal peptide of 21 residues each.

150

## 151 **Phylogenetic analysis**

152 EF-Hand proteins and other similar sequences were retrieved from literature and protein  
153 database as mentioned in results section and the multiple sequence alignment was  
154 performed on MAFFT v7.309 [26] with BLOSUM62 scoring matrix, gap open penalty of  
155 1.57, and offset value of 0.123. For the tree building, the Maximum-Likelihood analysis  
156 was done using JTT model of sequence evolution with 1000 bootstraps using PhyML 3.0  
157 [27] plugin using Geneious 11.1.5 software (<https://www.geneious.com>). The  
158 corresponding sequences are included in S1 Table. The tree was edited for better  
159 visualization and colors in iTOL v4 online tool [28]. The (frog) *X. laevis*, (mouse), *M.*  
160 *musculus*, and (human) *H. sapiens* calcineurin A sequences were selected as outgroups  
161 and does not contain EF-Hand motifs. In addition, the Orpin homologs from *A. japonicus*  
162 ARI48335.1 and PIK49419.1 were edited for the analyses by deleting the N-terminal  
163 residues down to the second predicted methionine for the reason mentioned above.

164

## 165 **Statistical analyses**

166 Statistical significance of the resulting data was evaluated through one-way ANOVA using  
167 the JMP®, Version 12. SAS Institute Inc., Cary, NC, 1989-2019. The multiple comparison  
168 procedure and statistical test Tukey-Kramer HSD (honestly significant difference) was  
169 used to determine significant differences between means from optical densities  
170 determined by ImageJ software as mentioned before [10]. The Tukey-Kramer results are  
171 displayed as small circles for high number of data points and large circles for low number  
172 of data points. The large red circle shows significant differences to small grey circles



173 sample means. All values were reported as the mean  $\pm$  standard mean error, including  
174 mean diamond with confidence interval ( $[1 - \alpha] \times 100$ ), and outlier box plot from a  
175 quantiles report. While a  $P < .05$  and  $P < .001$  were considered to indicate statistical  
176 significance difference between groups.

177

178

## 179 **Results**

### 180 **Identification of the original *Orpin* (*Orpin A*) sequence and** 181 **characterization of a second *Orpin* isoform (*Orpin B*)**

182 The original report [3] described a contig sequence (4766-1) which was later annotated  
183 as *Orpin*. This contig was used as a template to identify the remaining nucleotides  
184 upstream from the open reading frame (ORF) region through RACE-PCR analysis [29].  
185 The *Orpin* sequence is composed of 106 nucleotides from the 5' UTR and 291 nucleotides  
186 from the 3' UTR with a 366 nucleotide ORF (plus stop codon) that encodes a putative 122  
187 amino acid peptide followed by a stop codon (Figs 1 and 2). The nucleotide composition  
188 of this gene sequence was validated by sequencing the RT-PCR products amplified from  
189 a normal intestine tissue cDNA sample (Fig 2). At the time it was annotated in the NCBI  
190 database (ACZ73832.1; 12/13/2009), there was no match with other sequences. Two  
191 similar sequences from the hemichordate *Saccoglossus kowalevskii* were later added as  
192 *Orpin*-like sequences (XP\_006824981.1 and XP\_002736736.1).

193

194 After performing further in-depth analyses of the available transcriptome libraries from  
195 regenerating and non-regenerating intestine and regenerating and non-regenerating  
196 radial nerve, we discovered an additional highly similar sequence that was identified as a  
197 putative *Orpin* isoform. This new putative protein shared 90% identity and 98% similarity  
198 with the original *Orpin* sequence but displayed different UTR's from the original sequence.  
199 We refer to this sequence as *Orpin B* to differentiate it from the original *Orpin* which we  
200 refer from now on as *Orpin A*.

201  
202 The sequence corresponding to *Orpin B* was also validated through RT-PCR amplification  
203 and sequencing (Fig 3 and S1 Fig). *Orpin B* mRNA sequence is composed of 103  
204 nucleotides from the 5' UTR and 364 nucleotides from the 3' UTR (Figs 1 and 3). Its ORF  
205 is 369 nucleotides (plus stop codon) long and encodes a putative 123 amino acid protein.

206  
207  
208 **Fig 1. *Orpin A* and *Orpin B* are isoforms.** Differences between sequences are highlighted. White bars:  
209 5' UTR and 3' UTR regions of both sequences; pink bar: predicted signal peptides; orange bar: ORF  
210 regions; purple bars: predicted EF-hand motifs; green: conservation level; top sequences: nucleotide and  
211 amino acid consensus sequences. Differences between nucleotide sequences are highlighted. It is shown  
212 a significant difference, especially between both 3' UTR sequences. Analysis was done using the MAFFT  
213 plugin in Geneious 11.1.5.

214  
215  
216 **Fig 2. Primers for sq-RT-PCR of *Orpin A*.** *Orpin A* UTRs regions (blue boxes) and coding region (green  
217 box) of the *Orpin A* gene. Primer sequences designed to specifically amplify *Orpin A* (light red letters).

218 Primer sequences used for the identification of the original *Orpin* sequence in previous reports (green  
219 letters). These primers were designed prior to identification *Orpin* isoform.

220

221

222 **Fig 3. Primers for sq-RT-PCR of *Orpin B*.** *Orpin B* UTR sequences (blue boxes) and coding region  
223 (green box). Primer sequences designed to specifically amplify *Orpin B* (blue letters).

224

225

226 Sequence comparisons among the two *Orpins* from *H. glaberrima* and the two *Orpin*-like  
227 sequences from *S. kowalevskii* show that the latter shared 46–50% identity and 76–77%  
228 similarity with the *Orpin A* (Fig 4). Similarly, *Orpin B* translated amino acid sequence  
229 shared 46–50% identity and 66–67% similarity with the sequences from *S. kowalevskii*  
230 (Fig 4). Furthermore, we identified three additional putative *Orpin* homologs from another  
231 sea cucumber species, *Apostichopus japonicus*, one from the starfish *Acanthaster planci*,  
232 and two from the sea urchin *Strongylocentrotus purpuratus* with expected values (*E*-value  
233 < 0.001 and total scores > 47.8). All *Orpin*-like sequences contain one domain that is  
234 predicted to be a calcium-binding domain composed of two EF-hand motifs at their  
235 carboxy-terminal (Figs 5 and 6).

236

237

238 **Fig 4. *Orpin* homologs pairwise sequence divergence.** Translated amino acid sequences comparison  
239 by (A) identity% and (B) similarity%. The alignments were done using Muscle with 50 iterations using  
240 Geneious 11.1.5.

241

242

243 **Fig 5. Orpin homologs alignment.** The most conserved residues are indicated by letters in black boxes,  
244 green identity regions, and large cartoon letters at the sequence Logo. The exception is PIK49419.1  
245 because 20 amino acid residues from the N-terminal portion are not compared to other sequences. We  
246 can see the additional N-terminal regions from *A. japonicus* sequences ARI48335.1 and PIK49419.1 that  
247 did not match to the other homologs. Blue box: signal peptide prediction; red box: EF-Hand motif pair  
248 prediction. This alignment was done by Muscle plugin with 50 iterations using Geneious 11.1.5.

249

250

## 251 **Domain analyses**

252 Orpin A and Orpin B amino acid sequences were analyzed using different bioinformatics  
253 tools (refer to methodology) for evidence that could point towards a possible function.  
254 After evaluating these sequences for domain composition using InterProScan and NCBI's  
255 CDD, and Phobos [14,20–22], we identified that both sequences contain putative calcium-  
256 binding domain regions. Both Orpin isoforms shared identical calcium-binding loops  
257 residue composition. The key residue positions that participate in calcium chelation within  
258 these loops are conserved when compared with other known EF-hand proteins. The X,  
259 Y, Z, -X, -Z positions from each loop of the EF-hands are Asp, Asp, Asp, Asp, Glu ("odd  
260 loop") and Asp, Asp, Asp, Ser, Glu ("even loop"), respectively (Fig 6). The only difference  
261 is located downstream to the "odd" loop. There are two consecutive amino acids, Leu87  
262 and Ile88, immediately after the Trp86 (-Z+1) of the first calcium-binding loop from Orpin  
263 A which are changed to Ser87 and Met88 in Orpin B. Interestingly, Orpin A and Orpin B  
264 included a Cys residue at -Z-1 position which is particular to both sea cucumber  
265 sequence homologs and is an unusual feature in EF-hand proteins.

266  
267 When we compared *H. glaberrima* Orpin EF-hand sequences to the other identified  
268 putative homologs from *S. kowalevskii*, *A. japonicus*, *A. planci*, and *S. purpuratus*, we  
269 found that additional positions are highly conserved as well. All Orpin sequences share  
270 conserved positions at X-4 (Phe), -Z (Glu), -Z+1 (Trp) and -Z+6 (Gly) positions from the  
271 “odd” EF-hands, and X-8 (Phe), X (Asp), Z (Asp), -X-1 (Ile), -X (Ser), -Z (Glu) and -Z+1  
272 (Phe) positions from the “even” EF-hands. Alternatively, there are residues particular to  
273 the EF-hands from *H. glaberrima* Orpin isoforms, such as Ala at X+1, Ser at Y, Ala at  
274 -X+1 from the odd EF-hand, and Val at X+1 and Asn at -X+2 from the even EF-hand.  
275 Moreover, there are residues that are particular to the holothurians such as Lys at X-3,  
276 Cys at -Z-1, Lys at -Z+9 from the odd EF-hand, and Lys at -Y from the even EF-hand  
277 (Fig 6).

278

279

280 **Fig 6. Orpin homologs EF-hand motifs alignment.** The predicted odd EF-hands match with the  
281 canonical EF-hand pattern and the predicted even EF-hands were identified as non-canonical motifs (14  
282 residues vs 12 residues) (red boxes). The non-canonical motifs are similar to vertebrates S100s.  
283 Predicted calcium coordinating residues from the identified EF-hands patterns are indicated by blue  
284 triangles. Holothurian Orpins contain a Cys residue at the -Z-1 position of the predicted calcium-binding  
285 loop (left orange box). The characteristic residues from Orpin residues are highlighted by orange boxes.  
286 Alignment was done using the MAFFT plugin in Geneious 11.1.5.

287

288

289 Additional bioinformatics analyses revealed the presence of a signal peptide in the N-  
290 terminal of both isoforms (Fig 7). These signal peptides are 20 amino acids long each

291 and are mainly composed of hydrophobic residues. The predicted signal peptides of Orpin  
292 A and Orpin B are nearly identical, with the exception of two residues at positions 3  
293 (Arg/Lys) and 15 (Ala/Ser). Furthermore, InterProScan and Phobius identified the same  
294 region of 20 residues as a possible transmembrane region. In both cases, a high  
295 probability of a cleavage site was identified at the Cys21 residue of each isoform.

296 If the signal peptide is eliminated, the remaining sequence is predicted to be localized  
297 outside the cytoplasm (Fig 7). This strongly suggests that these peptides could be  
298 secreted to the extracellular space and not targeted to the membrane of other cell  
299 organelles.

300  
301 The average length for the predicted signal peptides of the Orpin homologs is 20–22  
302 residues based on SignalP and Phobius predictions [23,24,30], from the initial Met  
303 residue. The predicted signal peptides from the two *S. kowalevskii* sequences are longer  
304 (22 residues) than the other Orpins. The predicted signal sequence of a sea urchin  
305 homolog (XP\_011664021.1) is the shortest (18) of the Orpins (Fig 5).

306  
307  
308 **Fig 7. Orpin A and Orpin B bioinformatics characterization.** (A) Orpin A and (B) Orpin B have  
309 predicted signal peptides at their transmembrane N-terminal regions including cleavage sites. Also, the  
310 two isoforms have predicted EF-hand motifs in their non-cytoplasmic regions. These were predicted by  
311 various bioinformatics plugin tools using Geneious 11.1.5.

312

313

314 The UTR's of the *H. glaberrima Orpin* sequences were also analyzed. Even though the  
315 5' UTR's from *Orpin A* and *Orpin B* are 80.2% identical, there are 20 nucleotide  
316 differences between them, mainly SNPs. A ribosome binding site within the 5' UTR of  
317 each isoform sequence was identified. In contrast, the retrieved 3' UTR's of both *Orpin*  
318 isoforms were completely different. Polyadenylation sites were identified in both *Orpin A*  
319 [8] and *Orpin B* downstream to their corresponding stop codons. Interestingly, these  
320 analyses revealed the presence of two putative Musashi binding elements (MBEs) within  
321 the 3'UTR of *Orpin A*. Even though the available retrieved 3' UTR from *Orpin B* is longer  
322 than its paralog, no MBEs were identified within this sequence. Surprisingly, two putative  
323 MBEs were also found within the coding sequence of each *Orpin* isotype.

324

325

## 326 **Orpin phylogenetic analysis**

327 In order to determine the relationship of the different Orpin homologs among themselves  
328 and with other EF-hand proteins, a phylogenetic tree was constructed with the PhyML  
329 program using a MAFFT alignment as input [26,27]. Orpin A and Orpin B amino acid  
330 sequences were used as probes to identify the closest sequences through BLAST  
331 searches against the public databases. In addition, representative sequences from  
332 different EF-Hand subfamilies of various organisms were obtained from the scientific  
333 literature and available databanks. These sequences included members from the  
334 following protein families: S100s, calcineurin, recoverin, calbindin, parvalbumin,  
335 oncomodulin, osteonectin, SPARC, troponin C, calmodulin, centrin, Spec, and recoverin

336 (S1 Table). Thus, these sequences were used for the final alignment to generate the  
337 phylogenetic tree.

338

339 The results from this analysis cluster Orpin and the identified hypothetical homologs from  
340 *S. kowalevskii* (acorn worm), *A. japonicus* (sea cucumber), *A. planci* (sea star), and *S.*  
341 *purpuratus* (sea urchin) together with a bootstrap value of 92, separately from other  
342 subfamilies of EF-Hand proteins (Fig 8). The other EF-Hand protein sequences cluster  
343 together as individual groups. The Orpin-like cluster was the most distant group after the  
344 outgroup sequences of mouse and frog calcineurin A, which do not contain EF-Hand  
345 motifs, suggesting that Orpins have evolved separately and are not direct homologs of  
346 EF-Hand proteins from other species. As expected, *H. glaberrima* Orpins were close to  
347 the other sea cucumber *A. japonicus* Orpin-like sequences. The most distant Orpin  
348 homologs were those from sea urchin *S. purpuratus*. The closest protein cluster was the  
349 osteonectins, BM-40, or SPARC proteins, which comprise a group of secreted CaBP  
350 modulators with a single pair of EF-Hand motifs. After these, the other group of proteins  
351 that appeared close by were the S100s, which also are small secreted proteins with two  
352 EF-hand motifs. The tree also showed the other outgroup EF-hand lacking protein,  
353 calcineurin A from humans, was placed separately from the other EF-Hand proteins of a  
354 high number of motifs (3 to 6 EF-Hands).

355

356

357 **Fig 8. Orpin isoforms are specific to the Ambulacraria clade.** EF-hand protein representative  
358 sequences from different subfamilies were aligned to build a phylogenetic tree. Orpin homologs were  
359 clustered together as a group, separated to the other EF-hand proteins. The tree was made using the



360 PhyML plugin ran through Geneious 11.1.5. The parameters used for this analysis were JTT model of  
361 amino acid substitution and 1000 bootstraps. Scale bar: 1. Protein sequences accession numbers are  
362 included in S1 Table.

363

364

## 365 ***Orpin* gene is expressed in several tissues of *H. glaberrima***

366 In order to determine the distribution of *Orpin* expression, mRNA was obtained from  
367 different tissues or organs of normal (non-regenerating) *H. glaberrima* specimens and  
368 processed for PCR analysis. The tissues and organs selected were: small intestine, large  
369 intestine, mesentery, radial nerve complex, longitudinal body wall muscle, gonads, and  
370 respiratory tree. Primers were designed for the specific detection of *Orpin A* and *Orpin B*  
371 mRNA sequences (Figs 2 and 3). Transcript levels were evaluated relative to the  
372 expression of *NADH subunit 5*, a constitutively expressed housekeeping gene. The  
373 results showed that *Orpin A* and *Orpin B* shared similar tissue specificity (Figs 9 and 10).  
374 Transcripts were detected in the gonads, muscle, mesentery, and haemal system but not  
375 in the respiratory tree nor in the nerve. Tissue expression varies significantly, with higher  
376 expression levels in the mesentery followed by the expression in muscle and gonads  
377 where it is slightly higher than in other tissues. Interestingly, a faint second lighter band  
378 was detected from *Orpin B* samples from gonads and muscle tissues.

379

380

381 **Fig 9. *Orpin A* expression in different tissues.** Composite image from RT PCR amplification of *Orpin A*  
382 from *H. glaberrima* tissues. *Orpin A* expression (top band) was detected in haemal system (H), muscle  
383 (Mu), gonads (G), and mesentery (Me) relative to the expression of *NADH*. *Orpin A* was detected neither

384 in the nerve (N) nor in the respiratory tree (RT). The image is a composite from different gels and is divided  
385 by a white line.

386

387

388 **Fig 10. *Orpin B* expression in different tissues.** Composite image from RT PCR amplification of *Orpin B*  
389 from *H. glaberrima* tissues. *Orpin B* expression (top band) was detected in haemal system (H), muscle  
390 (Mu), gonads (G), and mesentery (Me) relative to expression of *NADH*. *Orpin B* was detected neither in the  
391 nerve (N) nor in the respiratory tree (RT). The faint band below the *NADH* band corresponded to primer  
392 dimers. The image is a composite from different gels and is divided by a white line.

393

## 394 ***Orpin* expression during intestinal regeneration in the sea**

### 395 **cucumber *H. glaberrima***

396 Previous results from our laboratory have shown that *Orpin* was differentially expressed  
397 in regenerating intestinal tissues when compared to normal intestinal tissues [3,8]. In  
398 order to validate the upregulation of this novel sequence during regenerative processes,  
399 *Orpin* transcript levels were measured during different stages of intestine regeneration.  
400 In contrast to previous experiments where no particular effort was made to separate the  
401 intestine of normal animals from the attached mesenteries, in the present experiments  
402 we measured separately the intestine (a mixed portion from the small intestine and from  
403 the large intestine) and the mesentery that attaches the intestine to the body wall, for the  
404 normal (non-regenerating) samples. *Orpin* transcript levels were measured relative to the  
405 housekeeping gene *NADH subunit 5*. The gene expression levels were monitored using

406 semi-quantitative RT-PCR of tissue extracts from 3 days post evisceration (dpe), 5 dpe,  
407 7 dpe, and 10 dpe along with tissues from normal intestine and normal mesentery.

408  
409 Previously it was found that the expression levels of *Orpin A* increased after 3 days of  
410 intestine regeneration and then gradually returned to the basal levels at 14 days of  
411 regeneration. In contrast, to those findings [3,8], there was no statistically detected  
412 difference found between the transcript expression of *Orpin A* from normal intestine  
413 samples and those from any of the studied regenerative days (Data not shown). This was  
414 also true for *Orpin B* (Data not shown). However a high differential expression was  
415 detected between tissues from *Orpin A* from normal mesentery and tissues from 7–10  
416 dpe sample group, with a  $P < .05$  ( $P=.002$ ) (Fig 11). *Orpin B* exhibited a high differential  
417 expression between tissues from normal mesentery and tissues from 3–5 dpe with a  $P <$   
418  $0.05$  ( $P=.02$ ), and 7–10 dpe with a  $P < .001$  (Fig 12).

419  
420 Interestingly, we found a different expression profile between *Orpin A* and *Orpin B*  
421 transcript levels. While both *Orpin* forms show subsequently decreases in their  
422 expression to similar levels at 7-dpe to 10-dpe, the decrease of *Orpin B* seems to occur  
423 much faster than that of *Orpin A*.

424

425

426 **Fig 11. *Orpin A* expression during intestine regeneration grouped tissues.** Semi-quantitative RT-  
427 PCR amplification of *Orpin A* transcripts from mRNA samples from different intestine regenerative days  
428 compared to the corresponding expression in samples from normal intestine (NI) and normal mesentery  
429 (NM). A statistical high differential expression was found between NM and 7–10 days post evisceration

430 (dpe) ( $P < .05$ ;  $P = .002$ ); and between 3–5 dpe and 7–10 dpe ( $P < .05$ ;  $P = .03$ ) as indicated in the all  
431 pairs Tukey-Kramer HSD test. The large red circle (low number of data points) displays the significant  
432 difference between the small grey circles (high number of data points) group means. Red boxes: outlier  
433 box plots summarizing the distribution of points at each factor level from the quantiles report. Green  
434 diamonds: sample mean and confidence interval ( $[1 - \alpha] \times 100$ ). Blue lines: standard mean error.  
435 JMP®, Version 12 software was used for the statistical analyses.

436

437

438 **Fig 12. *Orpin B* expression during intestine regeneration grouped tissues.** Semi-quantitative RT-  
439 PCR amplification of *Orpin B* transcripts from mRNA samples from different intestine regenerative days  
440 compared to the corresponding expression in samples from normal intestine (NI) and normal mesentery  
441 (NM). A statistical high differential expression was found between NM and 3–5 dpe ( $P < .05$ ;  $P = .02$ ), and  
442 to 7–10 dpe ( $P < .001$ ) as indicated in the all pairs Tukey-Kramer HSD test. The large red circle (low  
443 number of data points) displays the significant difference between the small grey circles (high number of  
444 data points) group means. Red boxes: outlier box plots summarizing the distribution of points at each  
445 factor level from the quantiles report. Green diamonds: sample mean and confidence interval ( $[1 - \alpha]$   
446  $\times 100$ ). Blue lines: standard mean error. JMP®, Version 12 software was used for the statistical analyses.

447

448

## 449 Discussion

450 We have now described the presence of two predicted EF-hand domain-containing  
451 proteins from the sea cucumber *H. glaberrima*. These putative proteins apparently belong  
452 to a unique group that is present in echinoderms and hemichordates. According to the  
453 mRNA distribution in the sea cucumber, the translated proteins are expressed in multiple

454 organs. Moreover, they are highly represented within the mesentery of the normal and  
455 regenerating intestine. The possibility that these are Ca<sup>2+</sup>-binding proteins is discussed  
456 in the following sections.

457

458

## 459 ***Orpins* are novel genes**

460 When the first *Orpin* sequence from *H. glaberrima* was identified, no other sequence that  
461 showed significant similarity to it could be found within databases [3,8]. A few months  
462 later, two highly similar sequences (and possible homologs) were identified in the  
463 hemichordate *Saccoglossus kowalevskii* (acorn worm) and were added to the databases.  
464 These sequences were annotated with accession numbers XM\_006824918.1,  
465 XP\_006824981 (*E*-value: 9E-31) and XM\_002736690.2, XP\_002736736 (*E*-value: 2E-  
466 29). Later on, several homologs from closely related organisms of the Echinodermata  
467 phylum were added to the public databases: two from the sea urchin *Strongylocentrotus*  
468 *purpuratus*, three from other sea cucumber *Apostichopus japonicus*, and one from the  
469 starfish *Acanthaster planci*. The finding of an additional *Orpin* sequence in *H. glaberrima*  
470 increased to ten the known sequences and suggested that these sequences belong to a  
471 novel family of proteins within a group of metazoans. In all cases, the sequences have  
472 been annotated with little or no descriptive information other than their tissue/organism  
473 from where they originated. At present, *Orpins* appear to be restricted to the Ambulacraria  
474 clade (the group that encompasses echinoderms and hemichordates), however, it  
475 remains to be seen if, with the sequencing of other animal genomes, the specificity of  
476 *Orpins* to the Ambulacraria still stands.

477

478 Although the *H. glaberrima* A and B *Orpin* variants share a high percentage of similarity  
479 at the nucleotide and protein levels, our data suggest that they correspond to distinct  
480 genes. First, the nucleotide and putative amino acid differences are distributed throughout  
481 the complete sequence of both variants. Second, even though the 5' UTR sequences of  
482 both *Orpin* sequences share a large similarity, they are not identical, and similar to the  
483 coding region, have multiple nucleotide differences distributed along the nucleotide  
484 sequences. Third, their 3' UTR sequences are very different, sharing minimal similarities.  
485 Finally, other species also have more than one *Orpin*-like gene. For example, sequence  
486 information from *Orpin* homologs from *S. kowalevskii* and *S. purpuratus* were annotated  
487 as located in different loci. These differences are characteristic of different genes rather  
488 than allele variants or products from differential splicing. Nonetheless, in spite of these  
489 results that suggest two different isoforms originating from two different genes, it is  
490 necessary to have the genome information as conclusive evidence. Moreover, it should  
491 be emphasized that while *Orpin A* and *B* mRNAs have been identified and sequenced  
492 from various tissues (see below), the *S. kowalevskii*, *A. japonicus*, *A. planci*, and *S.*  
493 *purpuratus* sequences are hypothetical mRNA/protein-coding sequences that remain to  
494 be characterized. Even though it was expected that *H. glaberrima Orpin* sequences would  
495 be more similar to those from the other sea cucumber *A. japonicus*, the results showed  
496 that they shared higher similarity to the hemichordate *S. kowalevskii* sequences. This can  
497 be attributed to longer N-terminal regions from two of the *A. japonicus* sequences  
498 (ARI48335.1 and PIK49419.1) that did not match with any of the other homologs. These  
499 additional regions were annotated as part of the corresponding ORFs due to an identified

500 methionine upstream to the one that matched the other homologs. Given the fact that  
501 these sequences were not validated, it has to be considered the possibility that these first  
502 encoding methionine residues could be the result of a PCR artifact, and could be in fact  
503 part of their corresponding 5' UTR regions. Hopefully, the characterization of *Orpin*  
504 isoforms will provide essential insights that eventually would make feasible the  
505 characterization of these homolog sequences.

506

## 507 **Are Orpins calcium-binding proteins?**

508 Rigorous analysis of the residue composition of the EF-hand domains coupled to  
509 structural and functional experimentation is the mainframe of the study of uncharacterized  
510 CaBPs. Thus, understanding the architecture of EF-hand domains provides a hint of the  
511 role that a particular EF-hand protein might have.

512

513 One of the most prominent characteristics of the putative protein Orpin is the presence of  
514 EF-hand motifs that are a distinctive signature of calcium-binding proteins. The EF-hand  
515 motif has been used as a standard of reference for the description of the calcium-binding  
516 loops from the corresponding domain by the residues at key positions for the chelation of  
517 each calcium ion. Even though the EF-hand motifs are a characteristic feature of many  
518 CaBPs, few of them consist of less than four EF-hands. As mentioned before, Orpin A  
519 and Orpin B paralogs comprise a single putative calcium-binding domain composed of  
520 two EF-hands. The canonical EF-hand motif topology is a helix-loop-helix conformation,  
521 which regularly binds calcium ions [31,32]. Usually, this conformation is composed of a  
522 highly conserved 12 residues calcium-binding loop flanked on both sides by alpha-helices

523 [33]. The residues that participate in calcium coordination were labeled as X, Y, Z and -X,  
524 -Y, -Z [32,34], and those conserved positions are conventionally used as a reference  
525 frame to analyze the calcium-binding potential and dynamics of the EF-hand CaBPs. A  
526 typical EF-hand domain is composed of two calcium-binding loops containing motifs  
527 flanked by alpha-helices. The adjacent alpha helices are named incoming and exiting  
528 helices from the odd (N-terminal) and even (C-terminal) EF-hand motifs [35–38]. *H.*  
529 *glaberrima* Orpin isoforms odd calcium-binding loops are composed of highly conserved  
530 key amino acids of the canonical domain structure. We showed that these domains  
531 shared a high level of conservation in the residues that participate in the chelation of  
532 calcium ions. However, the “even” calcium-binding loop from sea cucumber Orpins  
533 slightly deviates from the canonical pattern. The conserved Gly6 residue that provides for  
534 loop flexibility is substituted by a Glu6. This substitution is well conserved throughout all  
535 the available Orpin homologs with the exception of the starfish sequence. Also, they share  
536 a conserved Trp13 at position -Z+1 of the “odd” EF-hand. Furthermore, this conserved  
537 residue seemed to be particular to Orpins after comparison to the other 84 EF-Hand  
538 sequences from this study. Interestingly, a Cys11 residue is particular to the holothurian  
539 Orpins.

540  
541 In view of these facts, Orpin homologs can be classified as novel EF-hand proteins.  
542 Although the bioinformatics analysis strongly suggests that they might be a new type of  
543 CaBPs, in order to assure this, experimental confirmation of the actual binding of calcium  
544 ions will be required along with the phylogenetic evidence provided in this study.

545



## 546 **Orpin relationship with other Ca<sup>2+</sup> binding proteins**

547 Whether they are indeed CaBPs or not, the sequence comparisons show that Orpins  
548 share several characteristics with CaBP subfamilies and that in fact, CaBPs account for  
549 the most similar proteins in the database. Several patterns have been developed to  
550 accurately classify newly discovered EF-hand proteins. The main pattern is the  
551 calmodulin canonical EF motif mostly known as the DXDXDG pattern [39,40], which  
552 contrasts with the pseudo-EF-hand binding loops from the most recent vertebrate S100  
553 family of proteins.

554  
555 One of the main EF-hand protein subfamilies are the S100 proteins. These proteins are  
556 small CaBPs containing only two EF-hand motifs. Nevertheless, their N-terminal motifs  
557 are considered pseudo-EF-hands, which is the main characteristic of this protein family.  
558 At the moment of this study, this subfamily has only been found in vertebrates [41].  
559 Although there were no pseudo-EF-hand predicted from both Orpin isoforms sequences,  
560 they share several characteristics with S100 proteins, such as the small size, acidic  
561 composition, secretion to extracellular location, and EF-hand motif number. Thus, Orpin  
562 sequences share structural features with the main CaBP subfamilies, making it difficult to  
563 classify them as any of them. Moreover, we have shown that Orpin and Orpin-like  
564 sequences clustered together more closely to osteonectins (BM-40/SPARC) proteins, a  
565 group of secreted CaBPs with only two EF-Hand motifs, suggesting that these two groups  
566 shared a common ancestral origin. In addition, the best-known CaBPs that grouped  
567 closely to Orpin-like sequences were mouse (*M. musculus*, AAA37432.1) and frog  
568 calcineurin A isoforms (*X. laevis*, AAC23449.1). These two sequences and the human

569 calcineurin A (*H. sapiens*, AAC37581.1) do not contain EF-hands and were included as  
570 outgroups for this analysis. We emphasize the fact that the calcineurin isoform B from  
571 zebrafish does contain an EF-hand domain, thus it is separated from the outgroup  
572 calcineurin A sequences and is included with the other aligned CaBPs. These results  
573 suggest that Orpin sequences comprise a specific EF-hand protein group that is different  
574 from the other known subfamilies of calcium-binding proteins. These data suggest that  
575 we can be dealing with a new subfamily of EF-hand proteins that is specific to the  
576 Ambulacraria clade.

577

## 578 **Orpins as secreted proteins**

579 In addition to their EF-hand motif, an additional feature of Orpins is the presence of a  
580 signal peptide. In this respect, Orpin isoforms strongly resemble the groups of EF-hand  
581 proteins that are secreted, namely the osteonectins, oncomodulins, and S100s. Similar  
582 to Orpin sequences, osteonectins (BM-40/SPARC), oncomodulin, and S100 proteins are  
583 small peptides containing two EF-hand motifs each and are secreted to the extracellular  
584 milieu. Interestingly, these proteins display calcium-mediated dimerization either as  
585 heterodimers as in the case of S100A8/S100A9 [42] or homodimers as in the case of  
586 S100P [43], osteonectins [44], and oncomodulin [45]. Usually, EF-hand proteins  
587 containing signal peptides are targeted to the outer plasma membrane. There, these  
588 CaBPs can act as growth factors recognizing binding targets located on other cell  
589 surfaces, thus activating different signaling pathways. Such is the case of osteonectin  
590 (BM-40/SPARC), which promotes changes in cell morphology, disrupt cell adhesion,  
591 inhibit cell cycle, regulate extracellular matrix, and modulate cell proliferation and

592 migration [46], thus underlying the process of wound repair. Similarly, the secreted  
593 (although lacking a signal peptide) oncomodulin and S100 proteins, are involved in a  
594 variety of biological processes including: cell proliferation, differentiation, survival, nerve  
595 regeneration, interaction with transcription factors, and calcium homeostasis [47–55]  
596 among other functions.

597

## 598 ***Orpins* and regeneration**

599 Previous results from our laboratory had shown differential expression of the *Orpin*  
600 transcript when mRNAs levels from 3- and 7- day regenerating intestines were compared  
601 to normal intestinal tissues. Thus, we had concluded that *Orpin* was over-expressed  
602 during intestinal regeneration. Our new data, where we detect high levels of the transcript  
603 in the mesentery region, questions our previous interpretation. Thus, if we consider that  
604 the samples containing the 3- and 5- day regenerating intestinal rudiments contain a large  
605 proportion of the remaining mesentery (that remains attached to the body wall), then the  
606 high expression of *Orpin A* and *B* transcript levels that were detected in the 3- or 5- day  
607 regenerating tissues can be interpreted as representing the expression in the mesenteric  
608 portion and not necessarily in the rudiment itself. As the rudiment itself grows and  
609 encompasses a larger proportion of the dissected tissues (in relation to the mesentery)  
610 then the *Orpin* expression would appear to decrease. This is why there is no difference  
611 between normal mesentery and early regenerating rudiments. The previously observed  
612 difference between regenerating rudiments and “normal” intestine would be merely a  
613 reflection of the proportion of mesenterial tissue present in both samples; low in “normal”  
614 intestines and high in regenerating ones.

615  
616 In this respect, the isolated “normal” mesentery is a more appropriate control to compare  
617 the relative expression of *Orpin* transcript sequences between regenerating and normal  
618 tissues. This is particularly true in early regenerating stages (3–5 days) when the  
619 proportion of tissues corresponding to the mesentery is quite high.

620  
621 While the lack of *Orpin* differential expression argues against a possible role in the  
622 intestinal regeneration process, we cannot completely exclude this possibility. The  
623 presence of Musashi binding elements within *Orpin* isoform sequences suggests that the  
624 post-transcriptional regulation of their mRNAs might be controlled by RNA-binding  
625 proteins. This element is present in genes that are post-transcriptionally regulated in a  
626 spatial and temporal dependent manner [56,57]. Moreover, this type of regulation has  
627 been implicated in the self-renewal of epithelial, neural and hematopoietic stem and  
628 progenitor cells [58–64]. Such is the case of the target transcript encoding the  
629 transcription factor TTK69 in *Drosophila*, where translational activation is mediated by the  
630 neural *Drosophila* Musashi. In this way, the Musashi protein induces the differentiation of  
631 *Drosophila* IIb cells as neural precursor cells by repressing the translation of the mRNA  
632 of this neural differentiation inhibitory factor [58]. Furthermore, the expression of  
633 mammalian Numb protein (m-Numb) induces the expression of regeneration-related  
634 genes such as prostate stem cell antigen (PSCA) and metallothionein-2 (Mt2) in gastric  
635 mucosal regeneration in mice. Musashi protein (Msi1) enhances the expression of m-  
636 Numb during this regenerative process through post-transcriptional regulation. Having  
637 stated this, we cannot disregard the possibility that *Orpin* isoforms play a role during the

638 initial stages of intestine and nerve regeneration. Nonetheless, to explore this possibility,  
639 we need to determine if a Musashi protein is present in the *H. glaberrima* proteome during  
640 regenerative processes of the sea cucumber and that it binds to *Orpins* mRNA.

641  
642 It is of interest that *Orpin* isoforms are found to be differentially expressed in a  
643 transcriptomic library of regenerating nerve from *H. glaberrima* [7], also suggesting a  
644 possible regeneration-associated function. The two sequences displayed an increase in  
645 expression during the regeneration of the radial nerve complex after induced injury. By  
646 day 2 and also by day 20 after nerve injury, *Orpin A* expression was significantly higher  
647 than non-regenerating radial nerve ( $P < .001$ ). In addition, *Orpin B* was higher in the same  
648 samples after day 2, 12, and 20 after nerve injury ( $P < .001$ ). However, in view of our  
649 findings in the intestinal system, it remains to be determined whether this differential  
650 expression is also the product of the gene is expressed preferentially in the remaining  
651 tissues following injury, and not necessarily of increasing its expression.

652  
653 In summary, we have identified and characterized a group of Orpin-like proteins from a  
654 particular group of invertebrate deuterostomes and shown they all share similarities in  
655 size, domain composition, and little significant similarities to other known EF-hand protein  
656 sequences. We provide bioinformatics evidence for the presence of signal peptides and  
657 cleavage sites in these proteins that suggest secretion of the putative proteins to the  
658 extracellular environment. Together, with the identification of predicted EF-hand domains  
659 with unique features, we can suggest that these might comprise a novel subfamily of EF-  
660 hand containing proteins specific to the Ambulacraria clade. Finally, we studied their

661 expression in normal and regenerating tissues, with the surprise finding that they are  
662 highly expressed in the intestinal mesentery.

663

664

## 665 **Acknowledgments**

666 The authors thank Dr. Vladimir S. Mashanov for editorial comments on the manuscript  
667 as well as to kindly provide sequence differential expression information from *Holothuria*  
668 *glaberrima* regenerating nerve.

## 669 **References**

- 670 1. García-Arrarás JE, Estrada-Rodgers L, Santiago R, Torres II, Díaz-Miranda L,  
671 Torres-Avillán I. Cellular mechanisms of intestine regeneration in the sea  
672 cucumber, *Holothuria glaberrima* Selenka (Holothuroidea:Echinodermata). *J Exp*  
673 *Zool.* 1998;281: 288–304. Available:  
674 <http://www.ncbi.nlm.nih.gov/pubmed/9658592>
- 675 2. García-Arrarás JE, Greenberg MJ. Visceral Regeneration in Holothurians.  
676 *Microsc Res Tech.* 2001;55: 438–451. doi:10.1002/jemt.1189
- 677 3. Rojas-Cartagena C, Ortíz-Pineda P, Ramírez-Gómez F, Suárez-Castillo EC,  
678 Matos-Cruz V, Rodríguez C, et al. Distinct profiles of expressed sequence tags  
679 during intestinal regeneration in the sea cucumber *Holothuria glaberrima*. *Physiol*  
680 *Genomics.* 2007;31: 203–15. doi:10.1152/physiolgenomics.00228.2006
- 681 4. San Miguel-Ruiz JE, García-Arrarás JE. Common cellular events occur during  
682 wound healing and organ regeneration in the sea cucumber *Holothuria*  
683 *glaberrima*. *BMC Dev Biol.* 2007;7: 115. doi:10.1186/1471-213X-7-115
- 684 5. Mashanov VS, Zueva OR, Garcia-Arraras JE. Organization of glial cells in the  
685 adult sea cucumber central nervous system. *Glia.* 2010;58: 1581–93.  
686 doi:10.1002/glia.21031
- 687 6. Mashanov VS, Zueva OR, García-Arrarás JE. Radial glial cells play a key role in  
688 echinoderm neural regeneration. *BMC Biol.* 2013;11: 49. doi:10.1186/1741-7007-  
689 11-49
- 690 7. Mashanov VS, Zueva OR, García-Arrarás JE. Transcriptomic changes during

- 691 regeneration of the central nervous system in an echinoderm. *BMC Genomics*.  
692 2014;15: 1–21. doi:10.1186/1471-2164-15-357
- 693 8. Ortiz-Pineda PA, Ramírez-Gómez F, Pérez-Ortiz J, González-Díaz S, Santiago-  
694 De Jesús F, Hernández-Pasos J, et al. Gene expression profiling of intestinal  
695 regeneration in the sea cucumber. *BMC Genomics*. 2009;10: 262.  
696 doi:10.1186/1471-2164-10-262
- 697 9. Suárez-Castillo EC, García-Arrarás JE. Molecular evolution of the ependymin  
698 protein family: a necessary update. *BMC Evol Biol*. 2007;7: 23. doi:10.1186/1471-  
699 2148-7-23
- 700 10. Schneider CA, Rasband WS, Eliceiri KW. NIH Image to ImageJ: 25 years of  
701 image analysis. *Nat Methods*. 2012;9: 671–675.
- 702 11. Sayers EW, Agarwala R, Bolton EE, Brister JR, Canese K, Clark K, et al.  
703 Database resources of the National Center for Biotechnology Information. *Nucleic*  
704 *Acids Res*. 2019;47: D23–D28. doi:10.1093/nar/gky1069
- 705 12. Altschul SF, Gish W, Miller W, Myers EW, Lipman DJ. Basic local alignment  
706 search tool. *J Mol Biol*. 1990;215: 403–410. doi:10.1016/S0022-2836(05)80360-2
- 707 13. Bias C, Gish W. Combined Use of Sequence Similarity and Codon Bias for  
708 Coding Region Identification. *J Comput Biol*. 1994;1: 39–50.
- 709 14. Marchler-bauer A, Bo Y, Han L, He J, Lanczycki CJ, Lu S, et al. CDD /  
710 SPARCLE : functional classification of proteins via subfamily domain  
711 architectures. 2017;45: 200–203. doi:10.1093/nar/gkw1129
- 712 15. Huang H-Y, Chien C-H, Jen K-H, Huang H-D. RegRNA: an integrated web server  
713 for identifying regulatory RNA motifs and elements. *Nucleic Acids Res*. 2006;34:



- 714 W429-34. doi:10.1093/nar/gkl333
- 715 16. Bengert P, Dandekar T. A software tool-box for analysis of regulatory RNA  
716 elements. 2003;31: 3441–3445. doi:10.1093/nar/gkg568
- 717 17. Buchan DWA, Jones DT. The PSIPRED Protein Analysis Workbench: 20 years  
718 on. *Nucleic Acids Res.* 2019;47: 402–407. doi:10.1093/nar/gkz297
- 719 18. Jones DT. Protein Secondary Structure Prediction Based on Position-specific  
720 Scoring Matrices. 1999;292: 195–202.
- 721 19. Castro E De, Sigrist CJA, Gattiker A, Bulliard V, Langendijk-genevaux PS,  
722 Gasteiger E, et al. ScanProsite : detection of PROSITE signature matches and  
723 ProRule-associated functional and structural residues in proteins. 2006;34: 362–  
724 365. doi:10.1093/nar/gkl124
- 725 20. Quevillon E, Silventoinen V, Pillai S, Harte N, Mulder N, Apweiler R, et al.  
726 InterProScan : protein domains identifier. 2005;33: 116–120.  
727 doi:10.1093/nar/gki442
- 728 21. Jones P, Binns D, Chang H, Fraser M, Li W, Mcanulla C, et al. Sequence analysis  
729 InterProScan 5 : genome-scale protein function classification. 2014;30: 1236–  
730 1240. doi:10.1093/bioinformatics/btu031
- 731 22. Yao X, Liu Y, Tan Y, Song Y, Corlett RT. The complete chloroplast genome  
732 sequence of *Helwingia himalaica* (Helwingiaceae, Aquifoliales) and a chloroplast  
733 phylogenomic analysis of the Campanulidae. *PeerJ.* 2016;4: e2734.  
734 doi:10.7717/peerj.2734
- 735 23. Juan J, Armenteros A, Tsirigos KD, Sønderby CK, Petersen TN, Winther O, et al.  
736 SignalP 5.0 improves signal peptide predictions using deep neural networks. *Nat*

- 737 Biotechnol. 2019;37: 420–423. doi:10.1038/s41587-019-0036-z
- 738 24. Madeira F, Park Y mi, Lee J, Buso N, Gur T, Madhusoodanan N, et al. The  
739 EMBL-EBI search and sequence analysis tools APIs in 2019. *Nucleic Acids Res.*  
740 2019;47: W636–W641. doi:10.1093/nar/gkz268
- 741 25. Edgar RC, Drive RM, Valley M. MUSCLE : multiple sequence alignment with high  
742 accuracy and high throughput. 2004;32: 1792–1797. doi:10.1093/nar/gkh340
- 743 26. Katoh K, Standley DM. MAFFT Multiple Sequence Alignment Software Version 7 :  
744 Improvements in Performance and Usability Article Fast Track. *Mol Biol Evol.*  
745 2013;30: 772–780. doi:10.1093/molbev/mst010
- 746 27. Guindon S, Dufayard J-F, Lefort V, Anisimova M, Hordijk W, Gascuel O. New  
747 algorithms and methods to estimate maximum-likelihood phylogenies : assessing  
748 the performance of PhyML 3 . 0 New Algorithms and Methods to Estimate  
749 Maximum-Likelihood Phylogenies : Assessing the Performance of PhyML 3.0.  
750 *Syst Biol.* 2010;59: 307–321. doi:10.1093/sysbio/syq010
- 751 28. Letunic I, Bork P. Interactive Tree Of Life (iTOL) v4: recent updates and new  
752 developments. *Nucleic Acids Res.* 2019;47: W256–W259.  
753 doi:10.1093/nar/gkz239
- 754 29. Ortíz-Pineda PA. Analysis and Characterization of Genes Associated with  
755 Intestinal Regeneration in the Sea Cucumber (Echinodermata: Holothuroidea):  
756 University of Puerto Rico (Rio Piedras Campus); 2010. 364 p.
- 757 30. Petersen TN, Brunak S, Heijne G Von, Nielsen H. Correspondence SignalP 4.0 :  
758 discriminating signal peptides from transmembrane regions. *Nat Publ Gr.* 2011;8:  
759 785–786. doi:10.1038/nmeth.1701

- 760 31. Persechini A, Moncrief ND, Kretsinger RH. The EF-hand family of calcium-  
761 modulated proteins. *Trends Neurosci.* 1989;12: 462–467. doi:10.1016/0166-  
762 2236(89)90097-0
- 763 32. Kretsinger RH, Tolbert D, Nakayama S, Pearson W. The EF-Hand, Homologs and  
764 Analogs. *Nov Calcium-Binding Proteins.* 1991; 17–37. doi:10.1007/978-3-642-  
765 76150-8\_3
- 766 33. Nelson MR, Chazin WJ. Structures of EF-hand Ca<sup>2+</sup>-binding proteins: Diversity in  
767 the organization, packing and response to Ca<sup>2+</sup> binding. *BioMetals.* 1998;11:  
768 297–318. doi:10.1023/A:1009253808876
- 769 34. Malmendal A, Carlström G, Hambraeus C, Drakenberg T, Forsén S, Akke M.  
770 Sequence and Context Dependence of EF-Hand Loop Dynamics. An 15 N  
771 Relaxation Study of a Calcium-Binding Site Mutant of Calbindin D9k.  
772 *Biochemistry.* 1998; 2586–2595. doi:10.1021/bi971798a
- 773 35. Gifford JL, Walsh MP, Vogel HJ. Structures and metal-ion-binding properties of  
774 the Ca<sup>2+</sup>-binding helix-loop-helix EF-hand motifs. *Biochem J.* 2007;405: 199–221.  
775 doi:10.1042/BJ20070255
- 776 36. Moncrief ND, Kretsinger RH, Goodman M. Evolution of EF-hand Calcium-  
777 modulated Proteins. I. Relationships Based on Amino Acid Sequences. *J Mol*  
778 *Evol.* 1990;30: 522–562. doi:Doi 10.1007/Bf02101108
- 779 37. Grabarek Z. Structural Basis for Diversity of the EF-hand Calcium-binding  
780 Proteins. *J Mol Biol.* 2006;359: 509–525. doi:10.1016/j.jmb.2006.03.066
- 781 38. Kawasaki H, Nakayama S, Kretsinger RH. Classification and evolution of EF-hand  
782 proteins. *BioMetals.* 1998;11: 277–295. doi:10.1023/A:1009282307967

- 783 39. Rigden DJ, Galperin MY. The DxDxDG motif for calcium binding: Multiple  
784 structural contexts and implications for evolution. *J Mol Biol.* 2004;343: 971–984.  
785 doi:10.1016/j.jmb.2004.08.077
- 786 40. Denessiouk K, Permyakov S, Denesyuk A, Permyakov E, Johnson MS. Two  
787 Structural Motifs within Canonical EF-Hand Calcium- Binding Domains Identify  
788 Five Different Classes of Calcium Buffers and Sensors. *PLoS One.* 2014;9: 1–14.  
789 doi:10.1371/journal.pone.0109287
- 790 41. Morgan RO, Martin-Almedina S, Garcia M, Jhoncon-Kooyip J, Fernandez MP.  
791 Deciphering function and mechanism of calcium-binding proteins from their  
792 evolutionary imprints. *Biochim Biophys Acta - Mol Cell Res.* 2006;1763: 1238–  
793 1249. doi:10.1016/j.bbamcr.2006.09.028
- 794 42. Edgeworth J, Gorman M, Bennett R, Freemont P, Hogg N. Identification of p8,14  
795 as a highly abundant heterodimeric calcium binding protein complex of myeloid  
796 cells. *J Biol Chem.* 1991;266: 7706–7713.
- 797 43. Vivo SPH, Koltzsch M, Gerke V. Identification of Hydrophobic Amino Acid  
798 Residues Involved in the Formation of. 2000; 9533–9539.
- 799 44. Maurer P, Hohenadl C, Hohenester E, Göhring W, Timpl R, Engel J. The C-  
800 terminal Portion of BM-40 (SPARC/Osteonectin) is an Autonomously Folding and  
801 Crystallisable Domain that Binds Calcium and Collagen IV. *J Mol Biol.* 1995;253:  
802 347–357. doi:10.1006/jmbi.1995.0557
- 803 45. Mutus B, Palmer EJ, MacManus JP. Disulfide-Linked Dimer of Oncomodulin:  
804 Comparison to Calmodulin. *Biochemistry.* 1988;27: 5615–5622.  
805 doi:10.1021/bi00415a033

- 806 46. Phan E, Ahluwalia A, Tarnawski AS. Role of SPARC-matricellular protein in  
807 pathophysiology and tissue injury healing: Implications for gastritis and gastric  
808 ulcers. *Med Sci Monit.* 2007;13: RA25-30.
- 809 47. Yin Y, Cui Q, Li Y, Irwin N, Fischer D, Harvey AR, et al. Macrophage-Derived  
810 Factors Stimulate Optic Nerve Regeneration. *J Neurosci.* 2003;23: 2284–2293.  
811 doi:10.1523/JNEUROSCI.23-06-02284.2003
- 812 48. Yin Y, Cui Q, Gilbert H-Y, Yang Y, Yang Z, Berlinicke C, et al. Oncomodulin links  
813 inflammation to optic nerve regeneration. *Proc Natl Acad Sci U S A.* 2009;106:  
814 19587–19592. doi:10.1073/pnas.0907085106
- 815 49. Kurimoto T, Yin Y, Habboub G, Gilbert H-Y, Li Y, Nakao S, et al. Neutrophils  
816 express oncomodulin and promote optic nerve regeneration. *J Neurosci.* 2013;33:  
817 14816–24. doi:10.1523/JNEUROSCI.5511-12.2013
- 818 50. Yin Y, Cui Q, Li Y, Irwin N, Fischer D, Harvey AR, et al. Macrophage-derived  
819 factors stimulate optic nerve regeneration. *J Neurosci.* 2003;23: 2284–2293.  
820 doi:23/6/2284 [pii]
- 821 51. Donato R. S100: A multigenic family of calcium-modulated proteins of the EF-  
822 hand type with intracellular and extracellular functional roles. *Int J Biochem Cell*  
823 *Biol.* 2001;33: 637–668. doi:10.1016/S1357-2725(01)00046-2
- 824 52. Donato R. Functional roles of S100 proteins, calcium-binding proteins of the EF-  
825 hand type. *Biochim Biophys Acta - Mol Cell Res.* 1999;1450: 191–231.  
826 doi:10.1016/S0167-4889(99)00058-0
- 827 53. Donato R, Cannon BR, Sorci G, Riuzzi F, Hsu K, Weber DJ, et al. Functions of  
828 S100 proteins. *Curr Mol Med.* 2013;13: 24–57.

- 829           doi:10.2174/1566524011307010024
- 830   54.   Donato R, Sorci G, Riuzzi F, Arcuri C, Bianchi R, Brozzi F, et al. S100B's double  
831           life: Intracellular regulator and extracellular signal. *Biochim Biophys Acta - Mol*  
832           *Cell Res.* 2009;1793: 1008–1022. doi:10.1016/j.bbamcr.2008.11.009
- 833   55.   Schaub MC, Heizmann CW. Calcium, troponin, calmodulin, S100 proteins: From  
834           myocardial basics to new therapeutic strategies. *Biochem Biophys Res Commun.*  
835           2008;369: 247–264. doi:10.1016/j.bbrc.2007.10.082
- 836   56.   MacNicol MC, Cragle CE, MacNicol AM. Context-dependent regulation of  
837           Musashi-mediated mRNA translation and cell cycle regulation. *Cell Cycle.*  
838           2011;10: 39–44. doi:10.4161/cc.10.1.14388
- 839   57.   Takahashi T, Suzuki H, Imai T, Shibata S, Tabuchi Y, Tsuchimoto K, et al.  
840           Musashi-1 post-transcriptionally enhances phosphotyrosine-binding domain-  
841           containing m-Numb protein expression in regenerating gastric mucosa. *PLoS*  
842           *One.* 2013;8: e53540. doi:10.1371/journal.pone.0053540
- 843   58.   Okano H, Kawahara H, Toriya M, Nakao K, Shibata S, Imai T. Function of RNA-  
844           binding protein Musashi-1 in stem cells. *Exp Cell Res.* 2005;306: 349–356.  
845           doi:10.1016/j.yexcr.2005.02.021
- 846   59.   Nakamura M, Okano H, Blendy JA, Montell C. Musashi, a neural RNA-binding  
847           protein required for *Drosophila* adult external sensory organ development.  
848           *Neuron.* 1994;13: 67–81. doi:10.1016/0896-6273(94)90460-X
- 849   60.   Sakakibara S, Nakamura Y, Yoshida T, Shibata S, Koike M, Takano H, et al.  
850           RNA-binding protein Musashi family: roles for CNS stem cells and a  
851           subpopulation of ependymal cells revealed by targeted disruption and antisense

- 852 ablation. Proc Natl Acad Sci U S A. 2002;99: 15194–15199.  
853 doi:10.1073/pnas.232087499
- 854 61. Asai R, Okano H, Yasugi S. Correlation between Musashi-1 and c-hairy-1  
855 expression and cell proliferation activity in the developing intestine and stomach  
856 of both chicken and mouse. Dev Growth Differ. 2005;47: 501–510.  
857 doi:10.1111/j.1440-169X.2005.00825.x
- 858 62. Wang X-Y, Yin Y, Yuan H, Sakamaki T, Okano H, Glazer RI. Musashi1 modulates  
859 mammary progenitor cell expansion through proliferin-mediated activation of the  
860 Wnt and Notch pathways. Mol Cell Biol. 2008;28: 3589–99.  
861 doi:10.1128/MCB.00040-08
- 862 63. Kharas MG, Lengner CJ, Al-Shahrour F, Bullinger L, Ball B, Zaidi S, et al.  
863 Musashi-2 regulates normal hematopoiesis and promotes aggressive myeloid  
864 leukemia. Nat Med. 2010;16: 903–8. doi:10.1038/nm.2187
- 865 64. Hope KJ, Cellot S, Ting SB, MacRae T, Mayotte N, Iscove NN, et al. An RNAi  
866 screen identifies msi2 and prox1 as having opposite roles in the regulation of  
867 hematopoietic stem cell activity. Cell Stem Cell. 2010;7: 101–113.  
868 doi:10.1016/j.stem.2010.06.007
- 869  
870  
871  
872  
873  
874

## 875 **Supporting information**

876

877

878 **S1 Fig. RT-PCR primers test.** *Orpin A* and *Orpin B* RT-PCR amplification using primers for semi-  
879 quantitative analysis. cDNA used was from a pool of cDNAs including normal intestine, mesentery, and  
880 regenerating days tissues. Run cycles: 35. *Orpin B* primers show amplification of dimers, also shown in  
881 cDNA (-) control.

882

883

884

885

886

887 **S1 Table. EF-hand proteins sequences for the phylogenetic analyses**

888

889



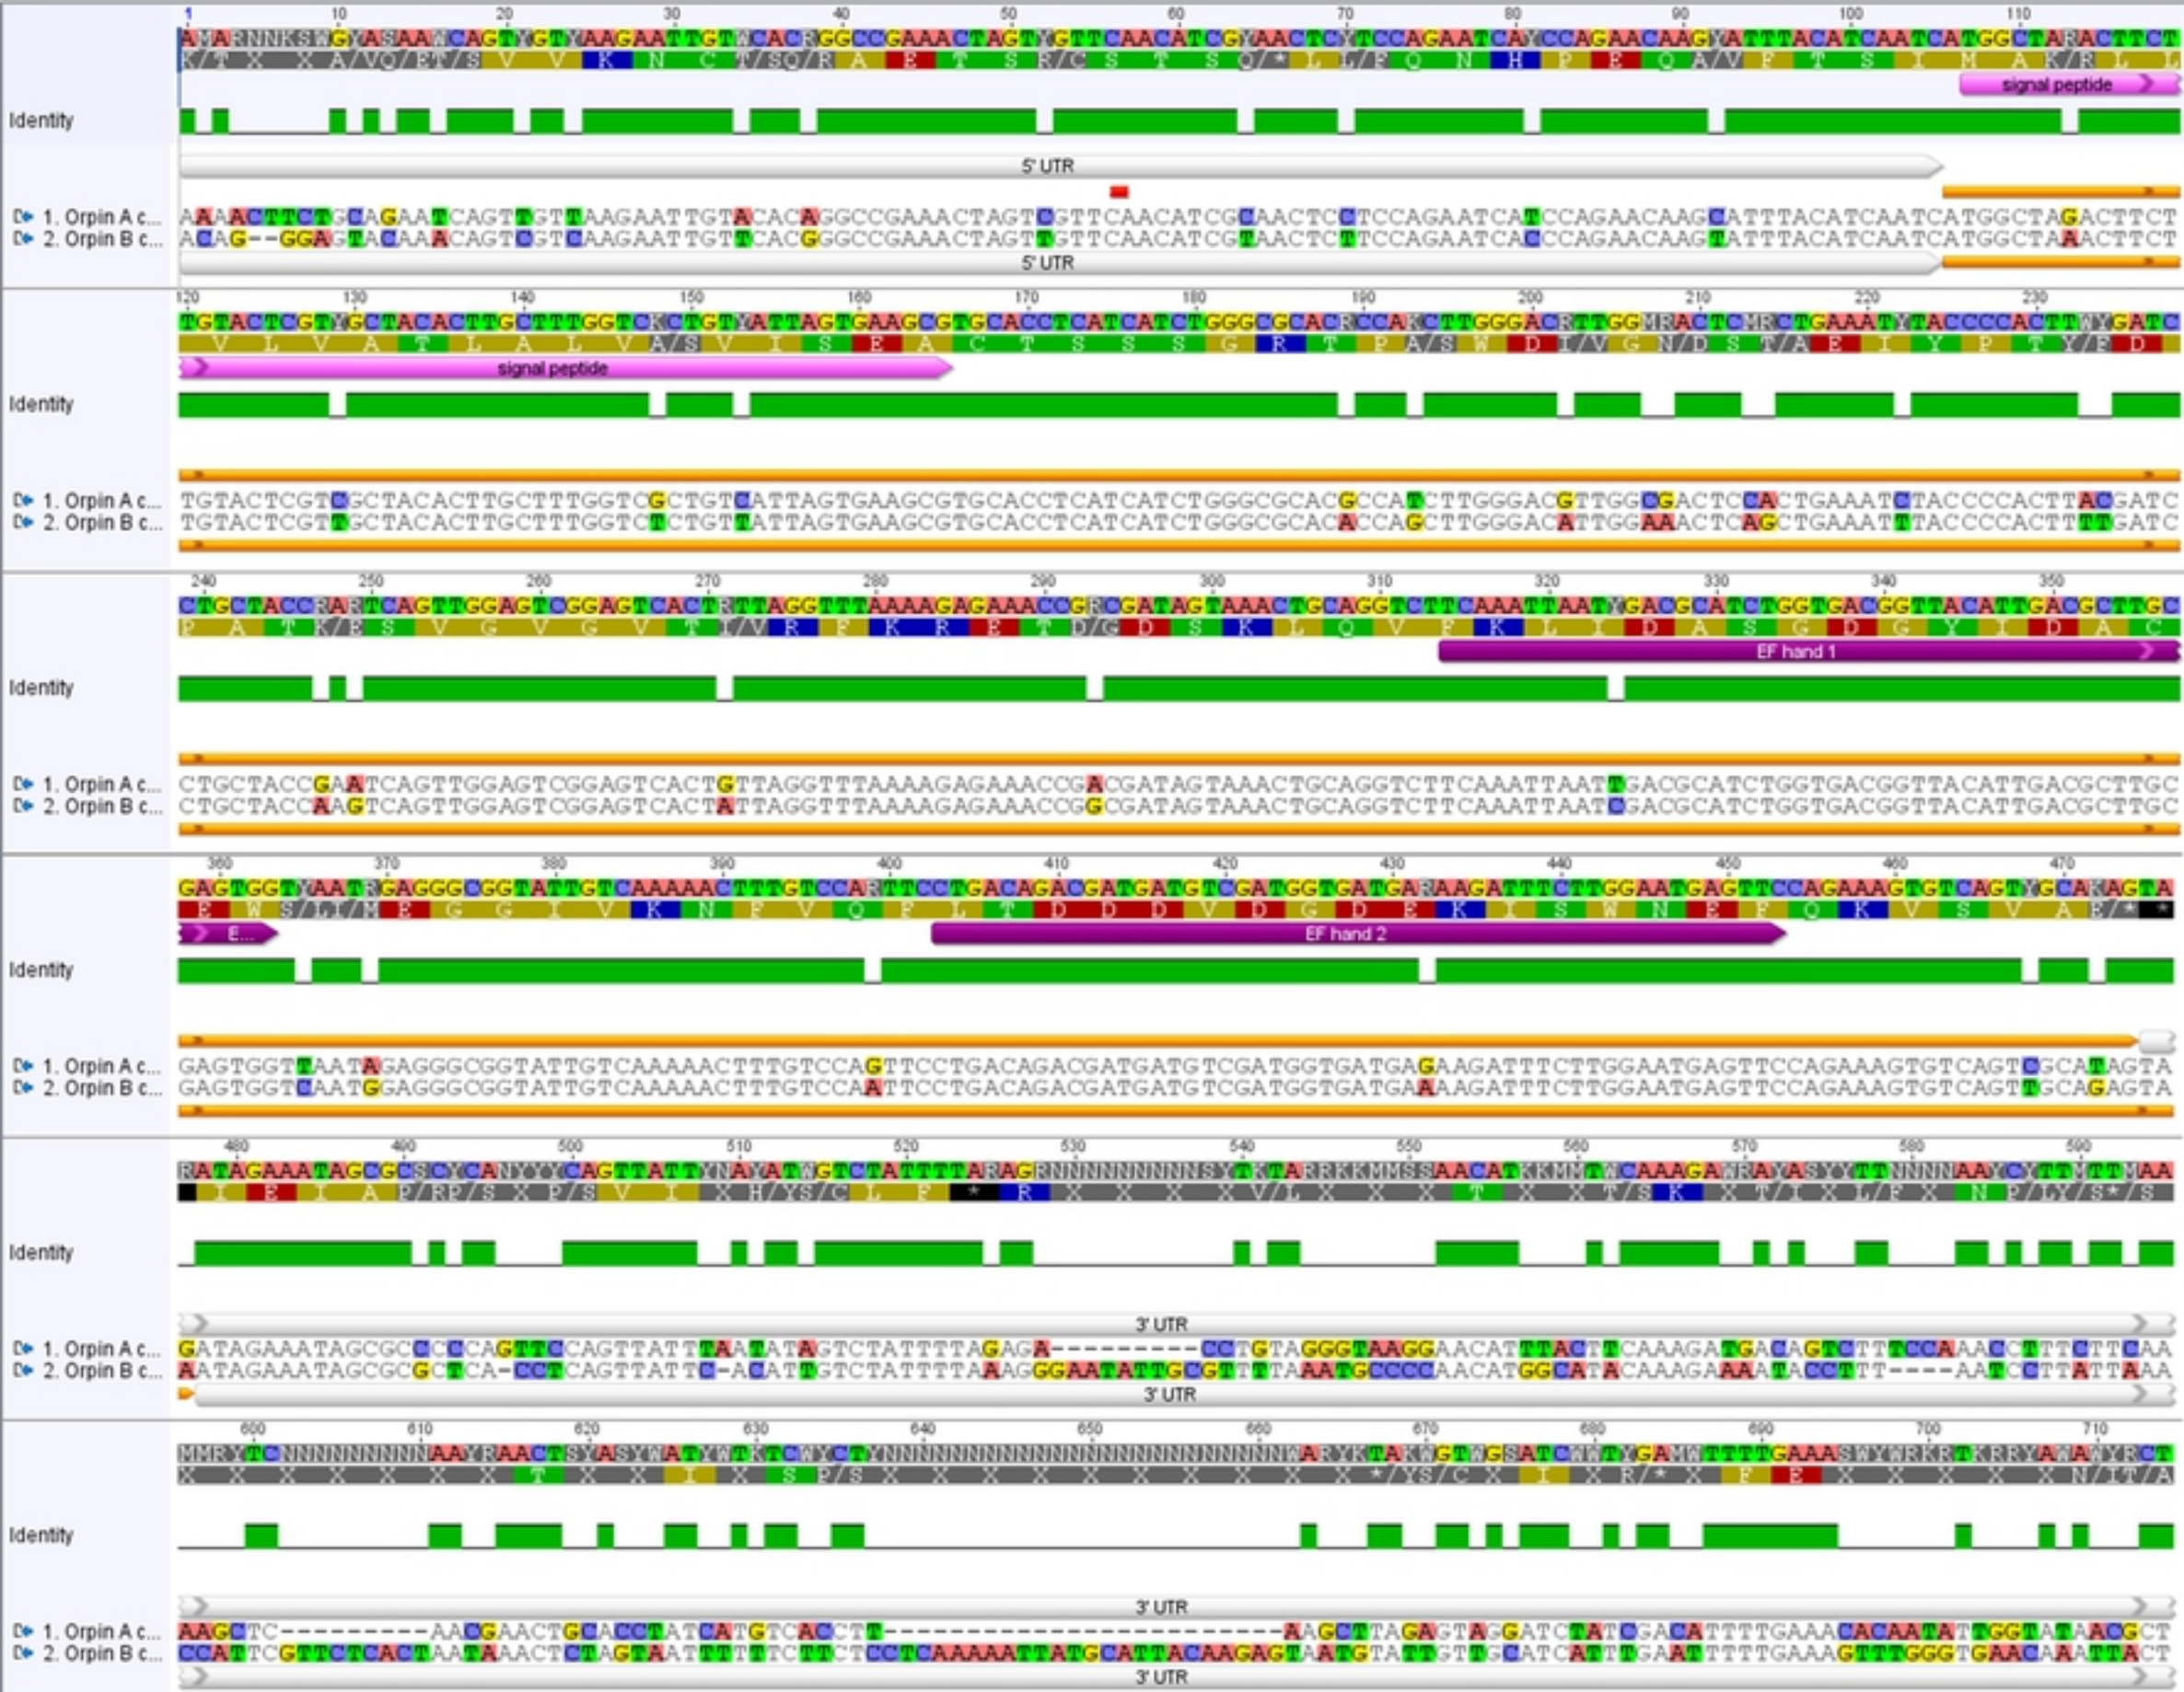

Figure 1

## ORPIN A

AAA ACTTCTGCAGAATCAGTTGTTAAGAAT TGTACACAGGCCGAAACTAGTCGTTCAACATCGCAA  
CTCCTCCAGAATCATCCAGAACAAGCATTACATCAATC

ATGGCTAGACTTCTTGTACTCGTCGCTACACTTGCTTTGGTCGCTGTCATTAGTGAAGCGTGACCT  
CATCATCTGGGCGCACGCCATCTTGGGAC GTTGGCGACTCCACTGAAA TCTACCCCACTTACGATCC  
TGCTACCGAATCAGTTGGAGTCGGAGTCACTGTTAGGTTTAAAAGAGAAACCGACGATAGTAACT  
GCAGGTCTTCAAATTAATTGACGCATCTGGTGACGGTTACATTGACGCTTGCGAGTGGTTAATAGAG  
GGCGGTATTGTCAAAAACCTTTGTCCAGTTCCTGACAGACGATG ATGTCGATGGTGATGAGAAGATT  
TCTTGGAATGAGTTCCAGAAAGTGTCAGTCGCATAG

TAGATAGAAATAGCGCCCCAGTTCAGTTATTTAATATAGTCTATTTTAGAGACCTGTAGGGTAAGG  
AACATTTACTTCAAAGATGACAGTCTTTCCAAACCTTTCTTCAAAGCTCAAC GAACTGCACCTATC  
ATGTCACCTTAAGCTTAGAGTAGGATCTATCGACATTTTGAAACACAATATTGGTATAACGCTCTTTG  
AATACCGATAATACCGGATGCATGGGTATATATGCAAGCAGAAAATAAATACATTGTCTCTATGTGAG  
CCATTGTGAAAAACCGTGAAAA

Figure 2

## ORPIN B

ACAGGGAGTACAAACAGTCGTCAAGAATTGTTACGGGGCCGAAACTAGTTGTTCAACATCGTAACT  
CTTCCAGAATCACCCAGAACAAGTATTTACATCAATC

ATGGCTAAACTTCTTGTACTCGTTGCTACACTTGCTTTGGTCTCTGTTATTAGTGAAGCGTGACACCT  
CATCATCTGGGCGCACACCAGCTTGGGACATTGGAAACTCAGCTGAAATTTACCCCACTTTTGATC  
CTGCTACCAAGTCAGTTGGAGTCGGAGTCACTATTAGGTTTAAAAGAGAAACCGGCGATAGTAAAC  
TGCAGGTCTTCAAATTAATCGACGCATCTGGTGACGGTTACATTGACGCTTGCGAGTGGTCAATGG  
AGGGCGGTATTGTCAAAAACCTTTGTCCAATTCCTGACAGACGATGATGTCGATGGTGATGAAAAGA  
TTTCTTGGAATGAGTTCCAGAAAGTGTCAGTTGCAGAGTAA

ATAGAAATAGCGCGCTCACCTCAGTTATTCACATTGTCTATTTTAAAGGGAATATTGCGTTTTAAATG  
CCCCAACATGGCATACAAAGAAAATACCTTTAATCCTTATTAACCATTTCGTTCTCACTAATAAACTC  
TAGTAATTTTTTTCTTCTCCTCAAAAATTATGCATTACAAGAGTAATGTATTGTTGCATCATTTGAATTT  
TTGAAAGTTTGGGTGAACAAATAACTTTTTGTGCAACAAATAATCGAATACTTCCTGTGAGAGCCTT  
ATTTCTTGAAAAGAAGCTATCGTACTGCCTTATTTTGAATTGTCTATCATACTGTATCTAACATATTG  
GTTTAAAATATATGAAAATTTTCT

Figure 3

A

|                             | ORPIN A OR... | ORPIN B OR... | S. kowalevsk... | S. kowalevsk... | A. japonicus ... | A. japonicus ... | A. japonicus ... | A. planci LO... | S. purpuratu... | S. purpuratu... |
|-----------------------------|---------------|---------------|-----------------|-----------------|------------------|------------------|------------------|-----------------|-----------------|-----------------|
| ORPIN A ORF translation     |               | 90.16%        | 43.08%          | 45.38%          | 46.81%           | 46.81%           | 35.00%           | 40.48%          | 34.35%          | 25.52%          |
| ORPIN B ORF translation     | 90.16%        |               | 43.51%          | 42.75%          | 47.52%           | 47.52%           | 33.89%           | 37.80%          | 31.82%          | 22.80%          |
| S. kowalevskii LOC100375... | 43.08%        | 43.51%        |                 | 86.23%          | 30.87%           | 32.21%           | 23.40%           | 25.74%          | 28.06%          | 20.00%          |
| S. kowalevskii LOC100369... | 45.38%        | 42.75%        | 86.23%          |                 | 29.53%           | 30.87%           | 23.40%           | 25.00%          | 31.65%          | 22.50%          |
| A. japonicus ARI48335.1     | 46.81%        | 47.52%        | 30.87%          | 29.53%          |                  | 81.07%           | 49.72%           | 37.32%          | 30.20%          | 22.86%          |
| A. japonicus PIK49419.1     | 46.81%        | 47.52%        | 32.21%          | 30.87%          | 81.07%           |                  | 49.72%           | 36.62%          | 30.20%          | 22.86%          |
| A. japonicus PIK49418.1     | 35.00%        | 33.89%        | 23.40%          | 23.40%          | 49.72%           | 49.72%           |                  | 25.27%          | 20.74%          | 16.47%          |
| A. planci LOC110976159      | 40.48%        | 37.80%        | 25.74%          | 25.00%          | 37.32%           | 36.62%           | 25.27%           |                 | 26.09%          | 18.09%          |
| S. purpuratus LOC105438...  | 34.35%        | 31.82%        | 28.06%          | 31.65%          | 30.20%           | 30.20%           | 20.74%           | 26.09%          |                 | 47.09%          |
| S. purpuratus LOC100890...  | 25.52%        | 22.80%        | 20.00%          | 22.50%          | 22.86%           | 22.86%           | 16.47%           | 18.09%          | 47.09%          |                 |

B

|                             | ORPIN A OR... | ORPIN B OR... | S. kowalevsk... | S. kowalevsk... | A. japonicus ... | A. japonicus ... | A. japonicus ... | A. planci LO... | S. purpuratu... | S. purpuratu... |
|-----------------------------|---------------|---------------|-----------------|-----------------|------------------|------------------|------------------|-----------------|-----------------|-----------------|
| ORPIN A ORF translation     |               | 98.36%        | 76.15%          | 76.92%          | 68.79%           | 67.38%           | 54.44%           | 67.46%          | 59.54%          | 45.31%          |
| ORPIN B ORF translation     | 98.36%        |               | 77.10%          | 77.86%          | 69.50%           | 68.09%           | 52.78%           | 66.14%          | 57.58%          | 44.04%          |
| S. kowalevskii LOC100375... | 76.15%        | 77.10%        |                 | 97.10%          | 56.38%           | 55.03%           | 45.21%           | 59.56%          | 56.12%          | 40.00%          |
| S. kowalevskii LOC100369... | 76.92%        | 77.86%        | 97.10%          |                 | 58.39%           | 57.05%           | 46.28%           | 60.29%          | 57.55%          | 41.50%          |
| A. japonicus ARI48335.1     | 68.79%        | 69.50%        | 56.38%          | 58.39%          |                  | 89.94%           | 69.06%           | 63.38%          | 51.68%          | 40.95%          |
| A. japonicus PIK49419.1     | 67.38%        | 68.09%        | 55.03%          | 57.05%          | 89.94%           |                  | 69.61%           | 64.08%          | 51.68%          | 40.95%          |
| A. japonicus PIK49418.1     | 54.44%        | 52.78%        | 45.21%          | 46.28%          | 69.06%           | 69.61%           |                  | 47.25%          | 44.15%          | 35.74%          |
| A. planci LOC110976159      | 67.46%        | 66.14%        | 59.56%          | 60.29%          | 63.38%           | 64.08%           | 47.25%           |                 | 51.45%          | 38.69%          |
| S. purpuratus LOC105438...  | 59.54%        | 57.58%        | 56.12%          | 57.55%          | 51.68%           | 51.68%           | 44.15%           | 51.45%          |                 | 56.80%          |
| S. purpuratus LOC100890...  | 45.31%        | 44.04%        | 40.00%          | 41.50%          | 40.95%           | 40.95%           | 35.74%           | 38.69%          | 56.80%          |                 |

Figure 4

# signal peptide

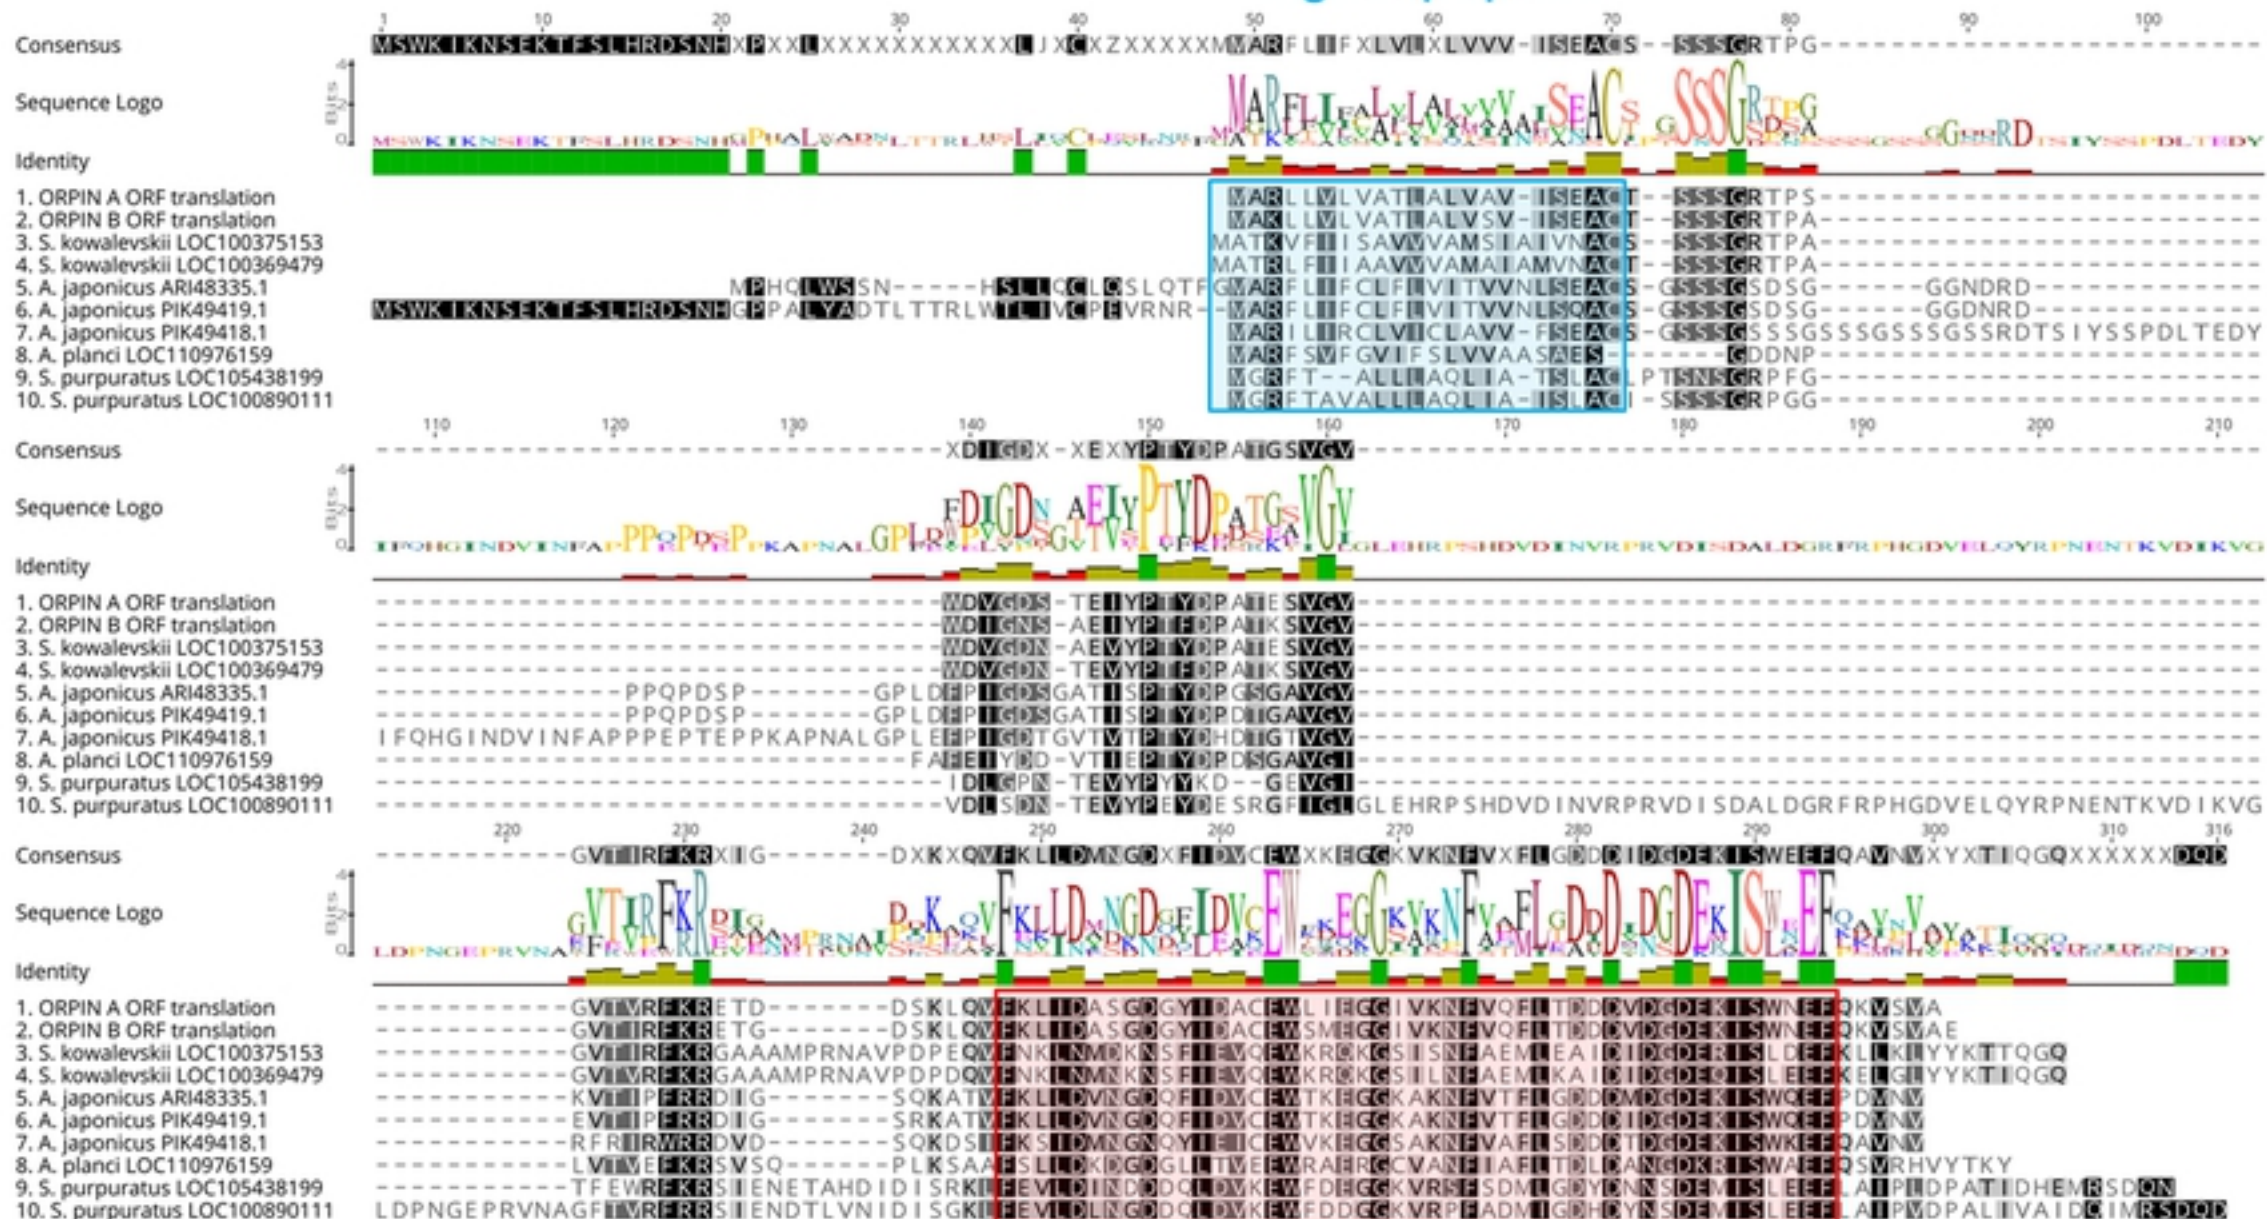

# EF-hand motif pair

Figure 5

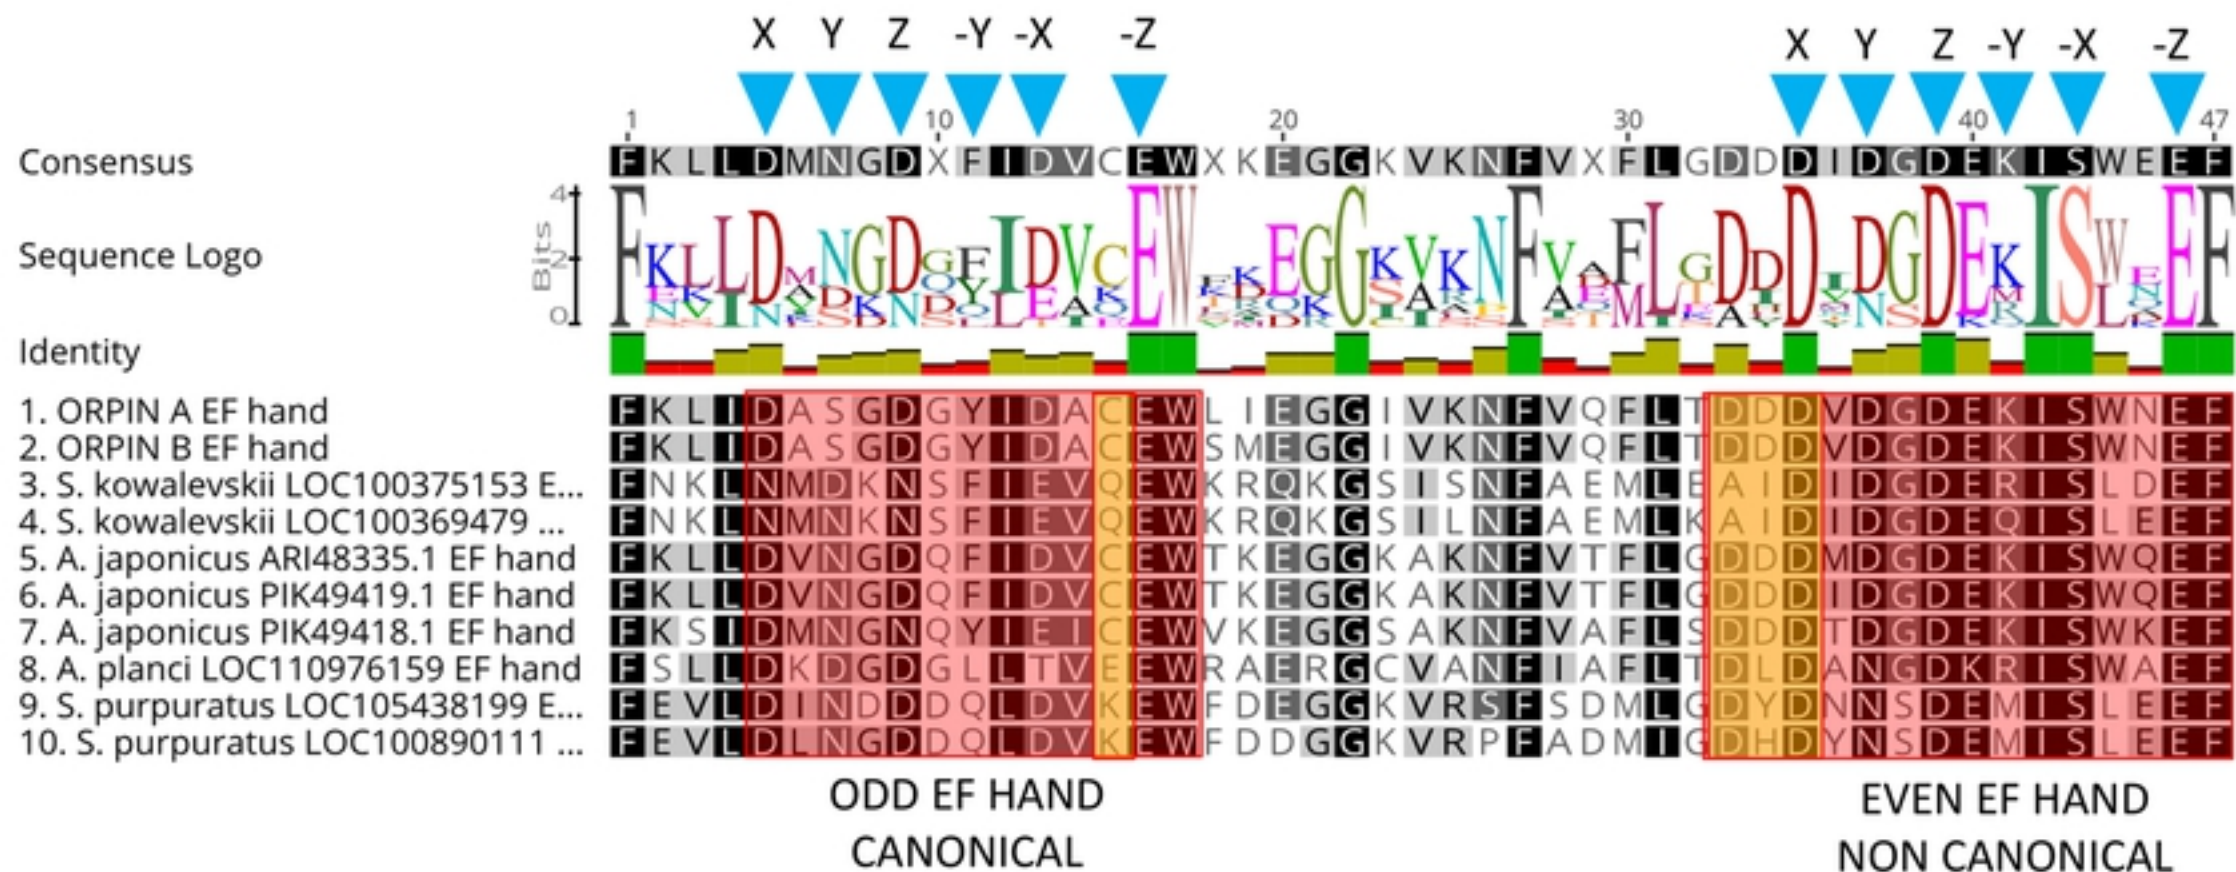

Figure 6

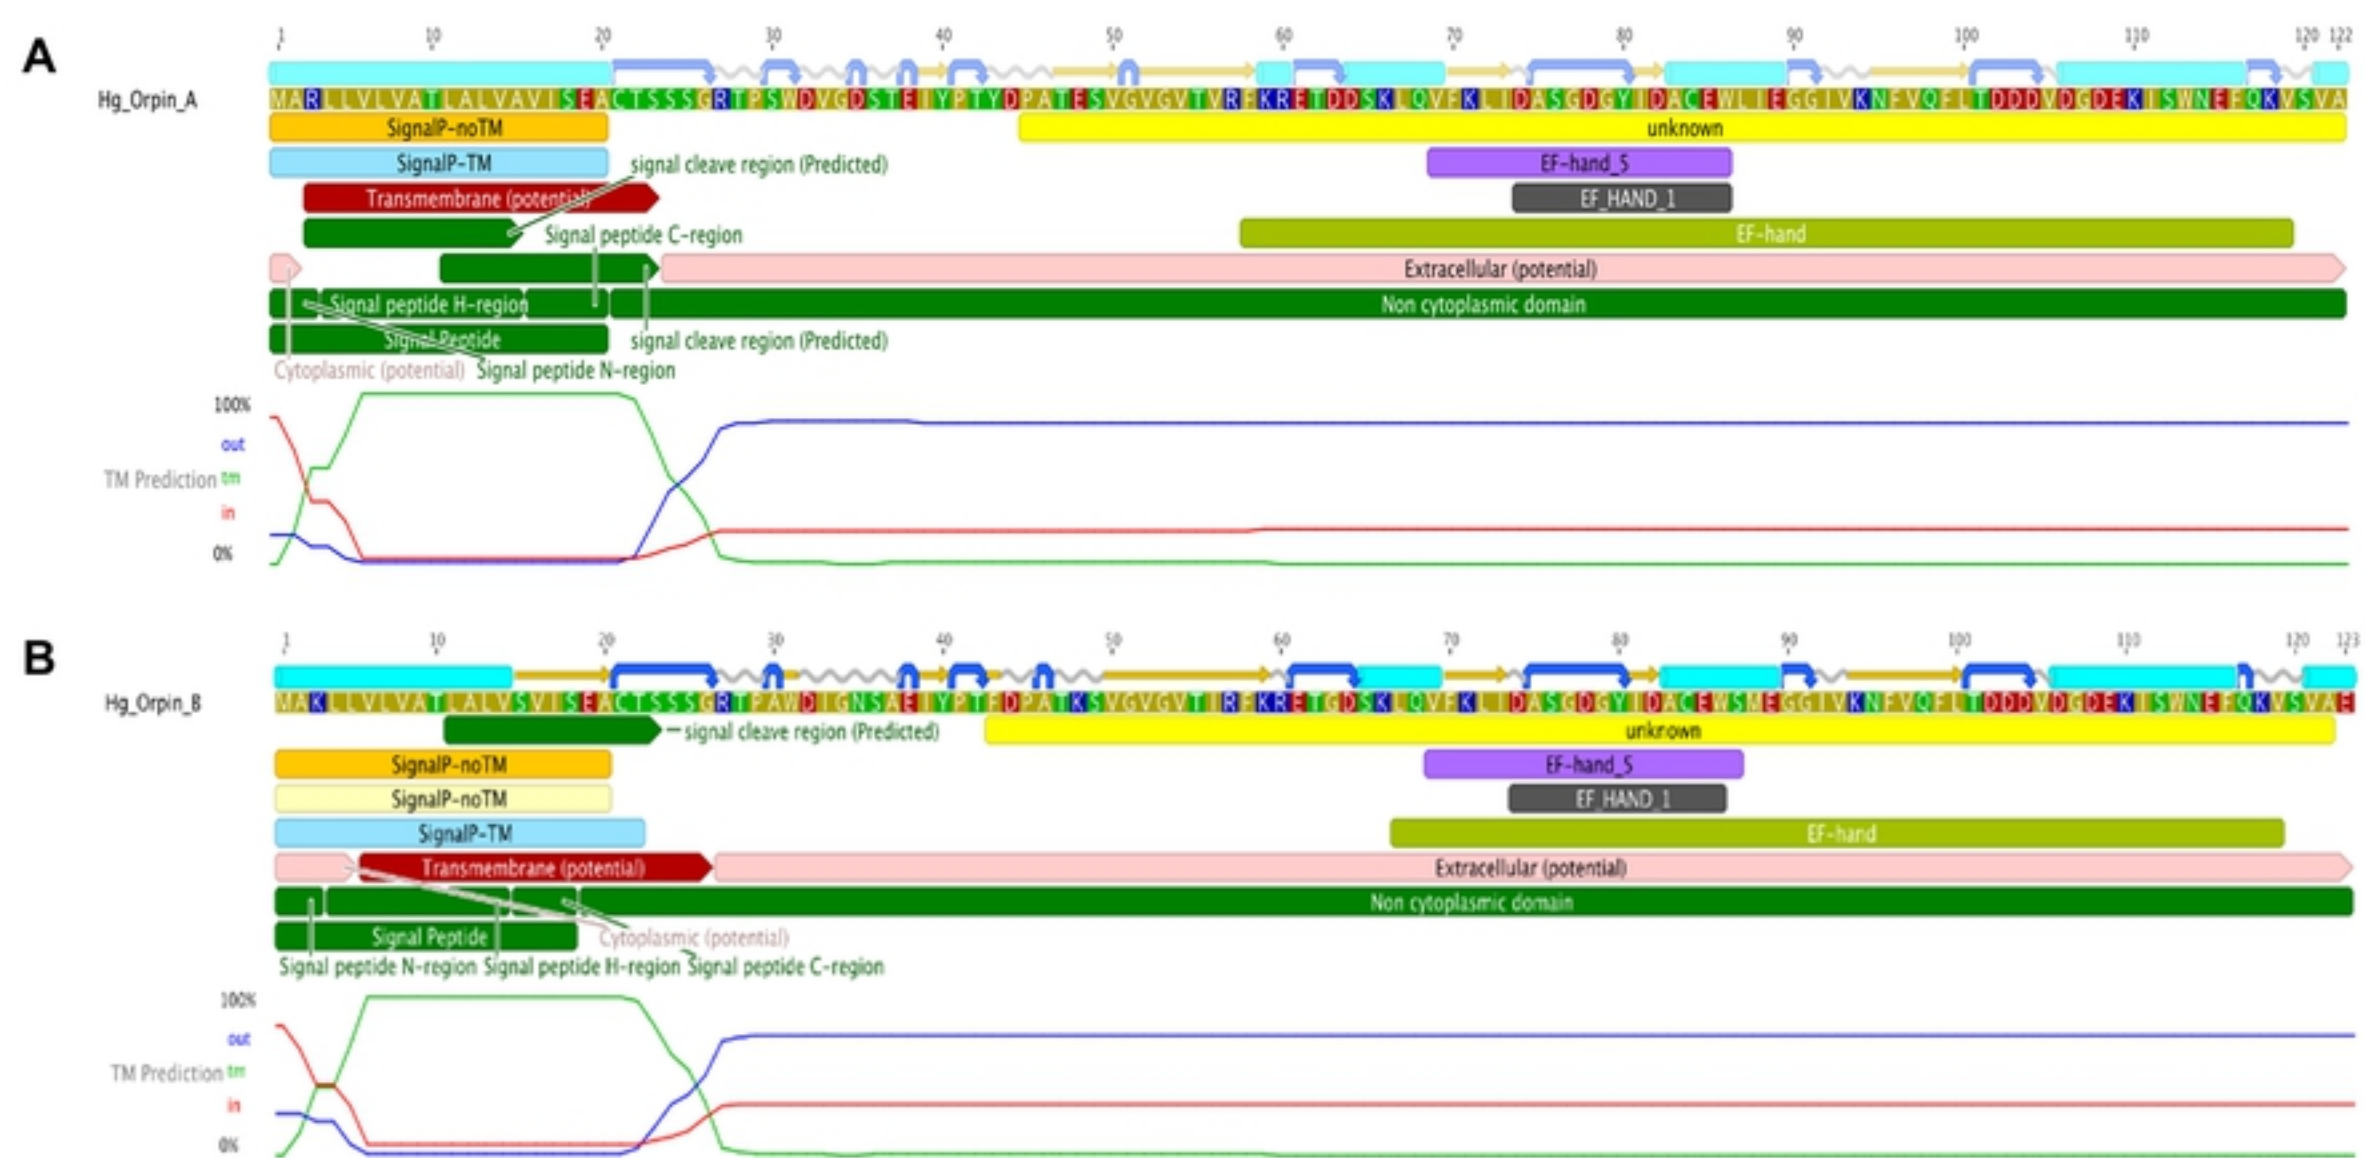

Figure 7

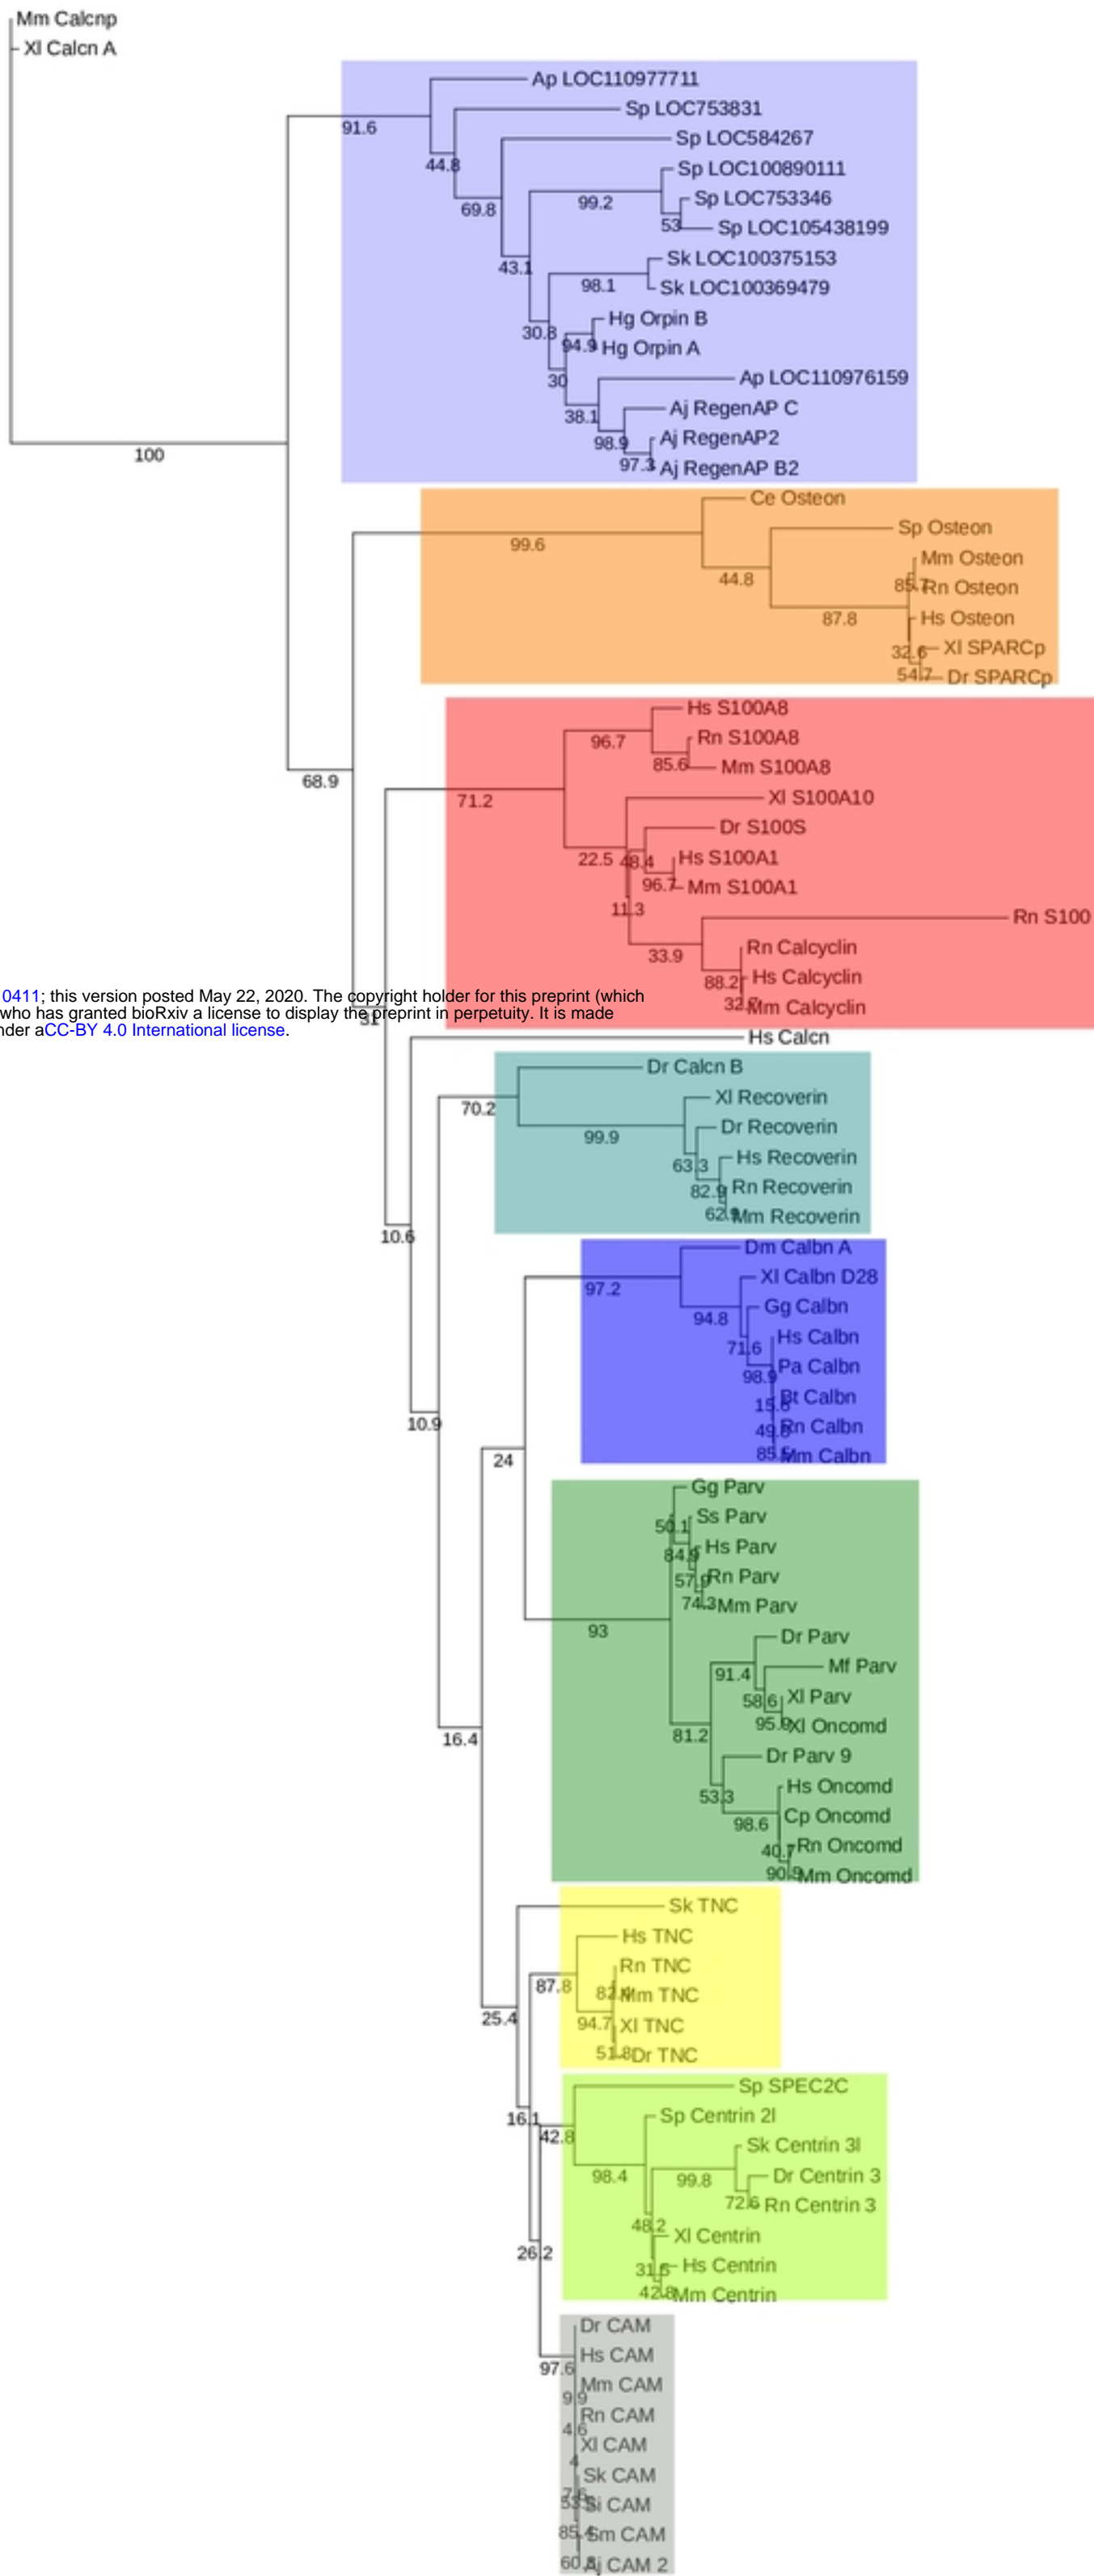

bioRxiv preprint doi: <https://doi.org/10.1101/2020.05.22.110411>; this version posted May 22, 2020. The copyright holder for this preprint (which was not certified by peer review) is the author/funder, who has granted bioRxiv a license to display the preprint in perpetuity. It is made available under aCC-BY 4.0 International license.

Figure 8



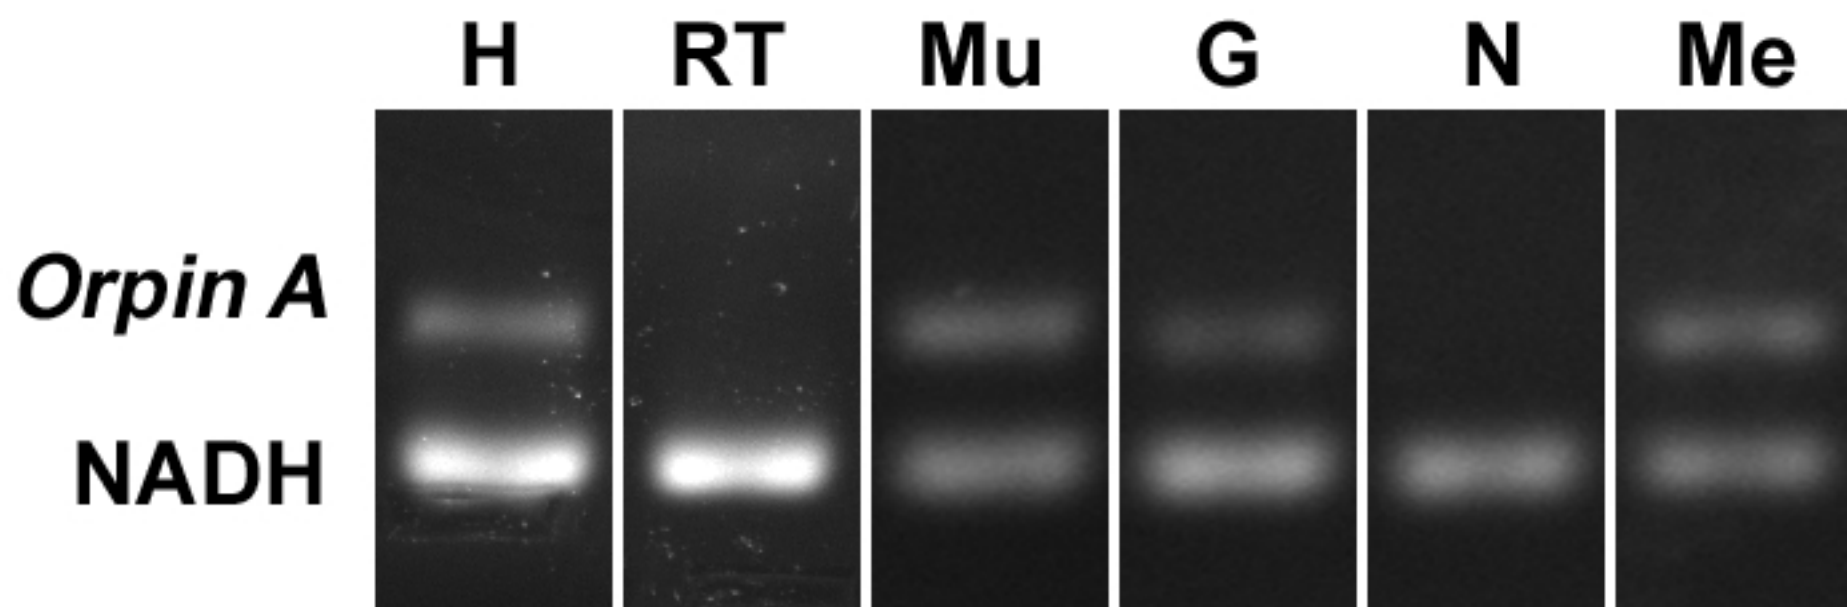

Figure 9

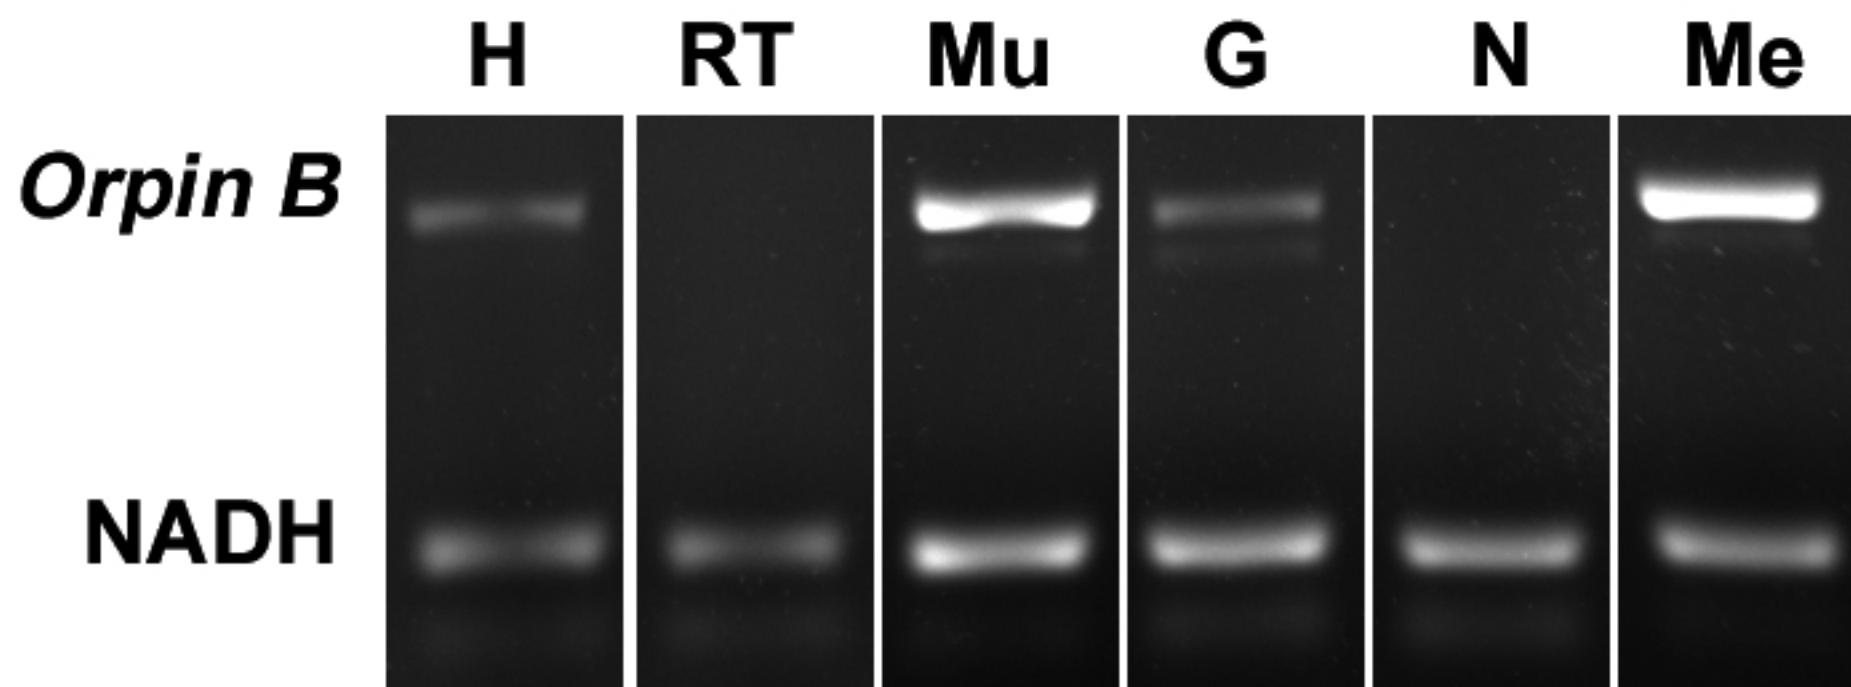

Figure 10

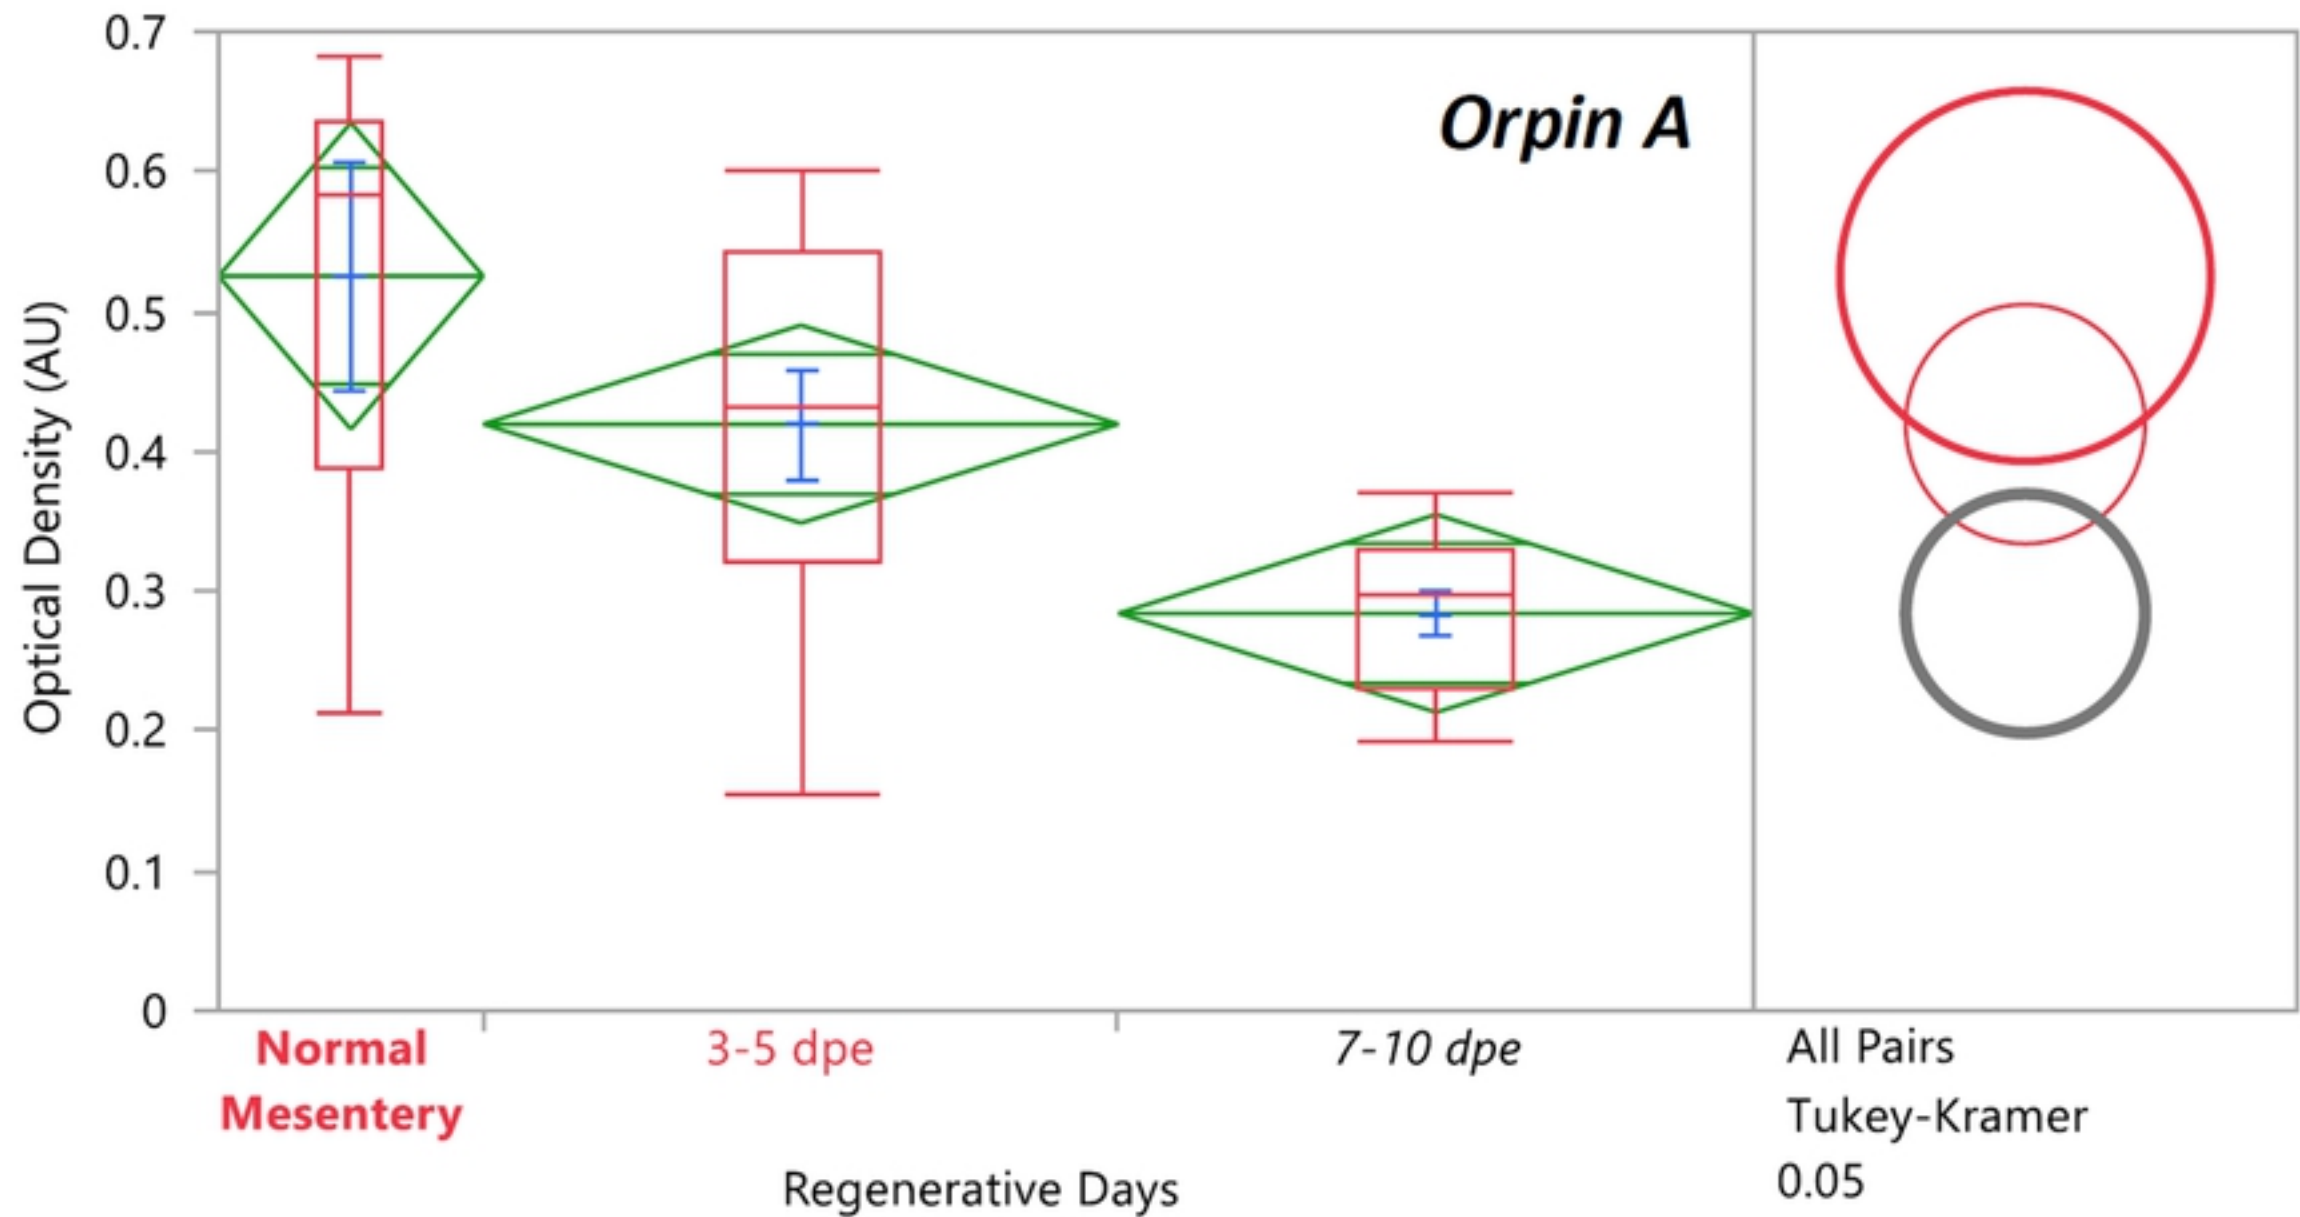

Figure 11

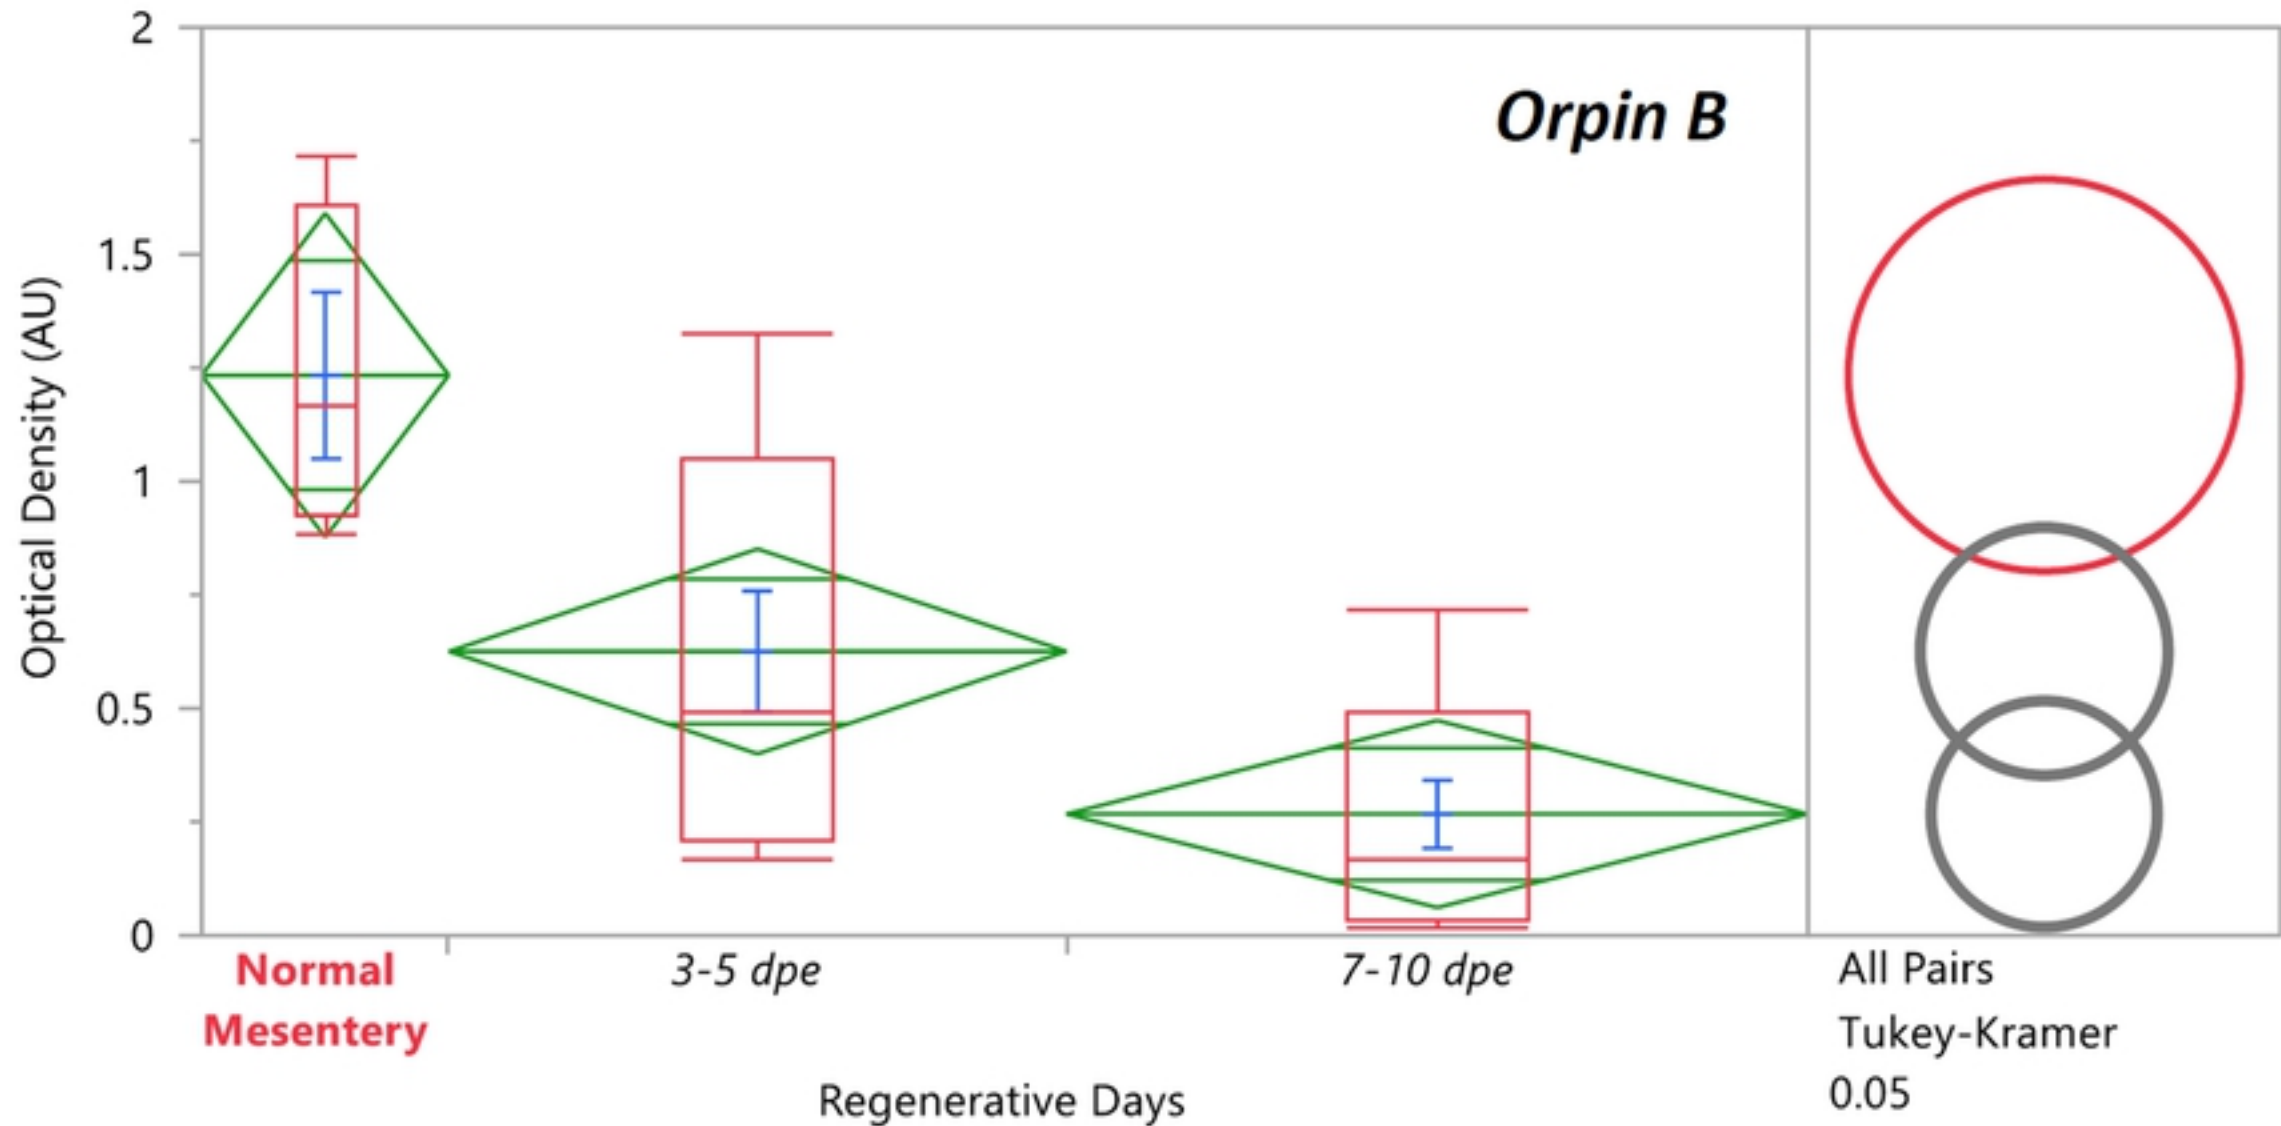

Figure 12
